# Supplementary material for: Efficient and scalable synthesis of α,α-disubstituted β-amino amides
Source: Royal Society of Chemistry journal article supplement (doi:10.1039/c6ob01219a), 2016-01-01

## Supporting Information

# Efficient and scalable synthesis of $\alpha,\alpha$ -disubstituted $\beta$ -amino acid derivatives

*Marianne Hagensen Paulsen<sup>a</sup>, Magnus Engqvist<sup>b</sup>, Dominik Ausbacher<sup>a</sup>, Morten Bøhmer Strøm<sup>a</sup> and Annette Bayer<sup>b,\*</sup>*

<sup>a</sup> Department of Pharmacy, UiT The Arctic university of Norway, NO-9037 Tromsø, Norway;

<sup>b</sup> Department of Chemistry, UiT The Arctic university of Norway, NO-9037 Tromsø, Norway

Email: [annette.bayer@uit.no](mailto:annette.bayer@uit.no)

## Contents

|                           |    |
|---------------------------|----|
| NMR SPECTRA OF 3A-3J..... | 2  |
| NMR SPECTRA OF 4A-4J..... | 12 |
| NMR SPECTRA OF 1A-1J..... | 22 |

# NMR spectra of 3a-3j

## 3a

PROTON\_cdd3\_T25\_001  
MHP005

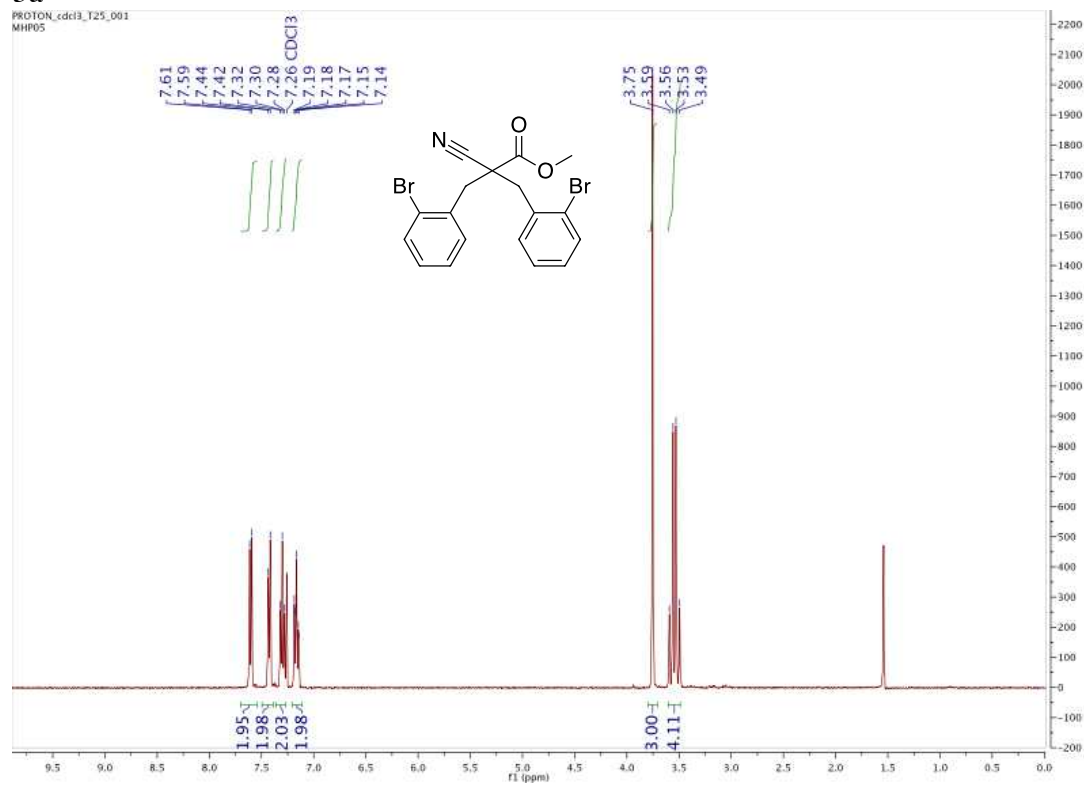

MHP0055

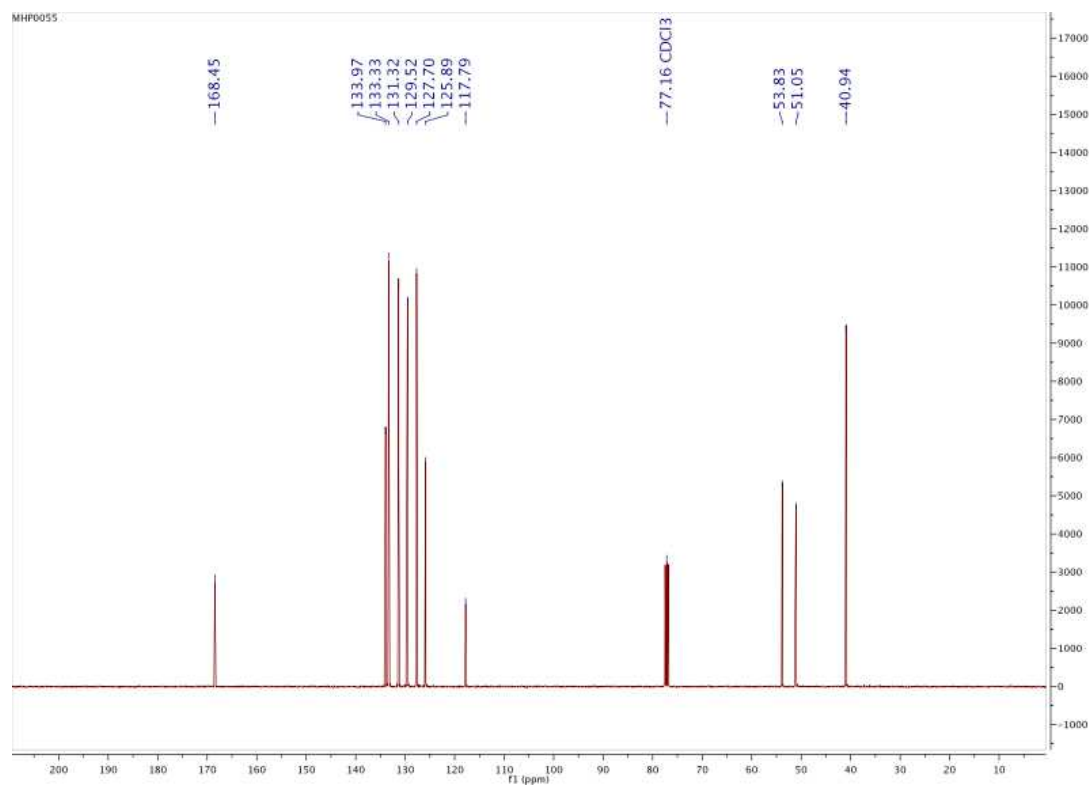

3b

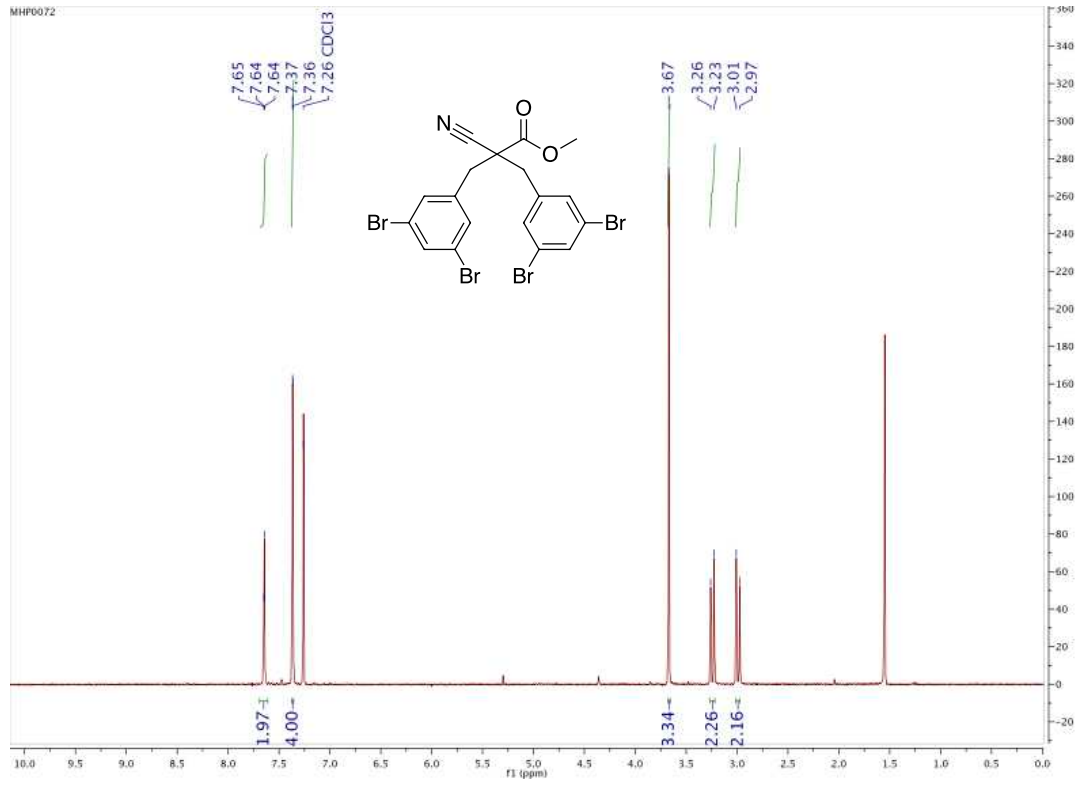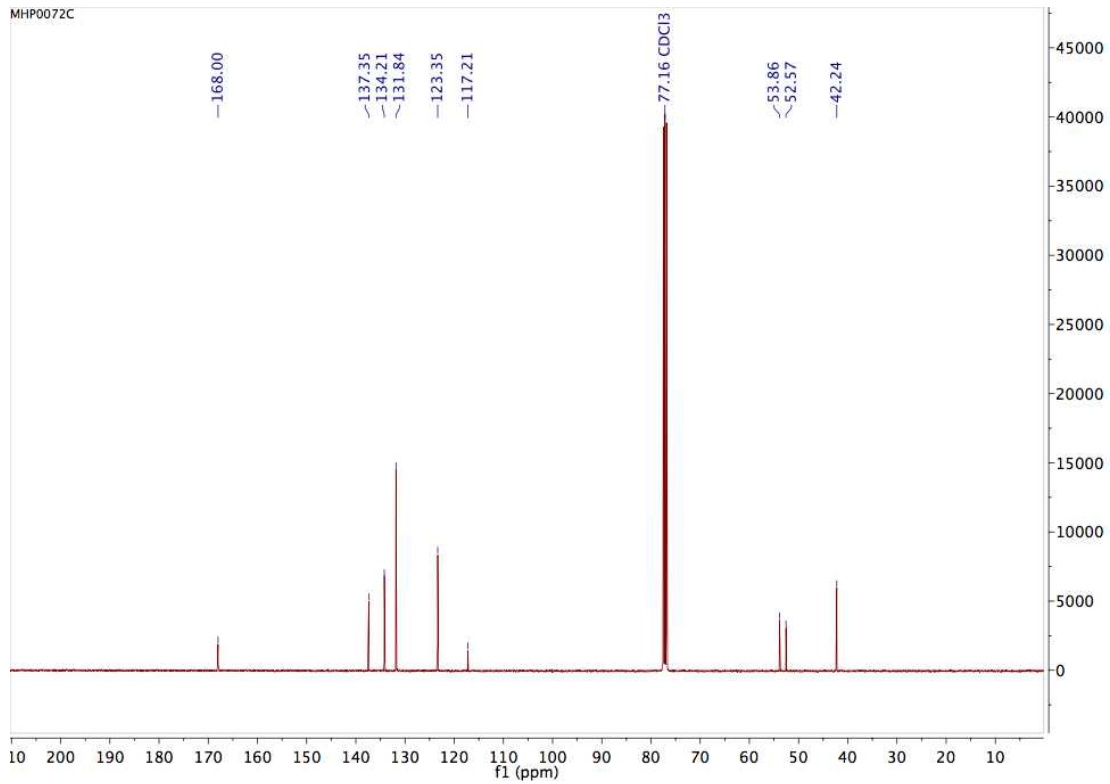

3c

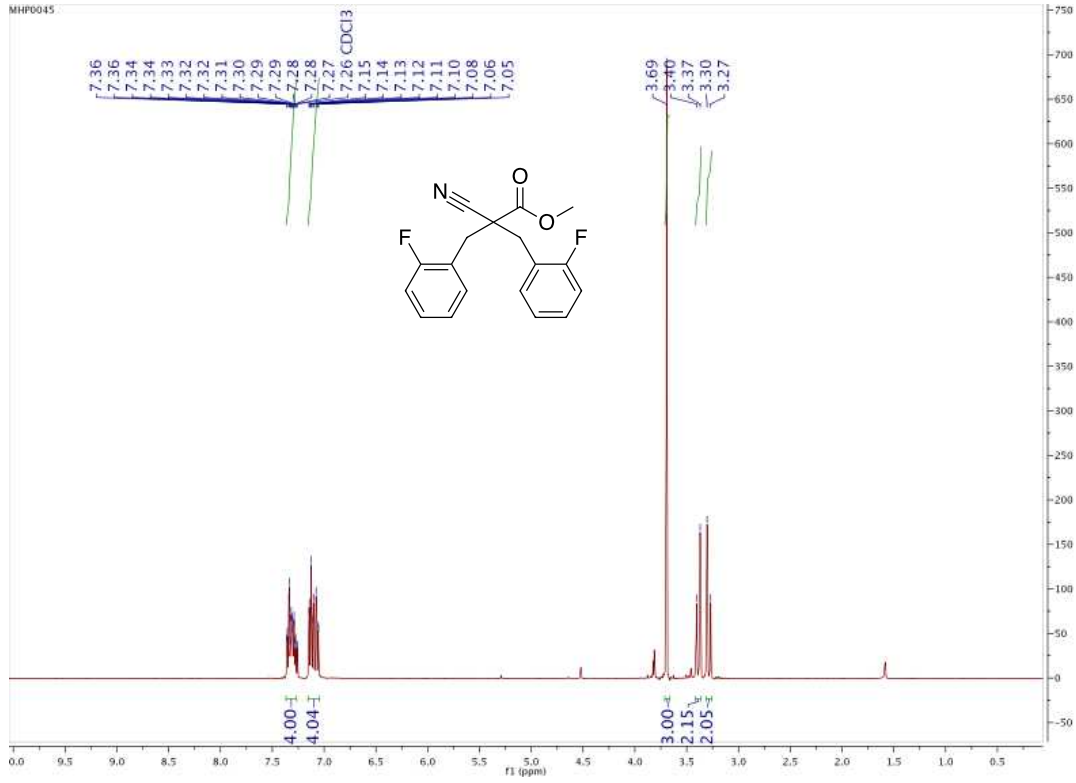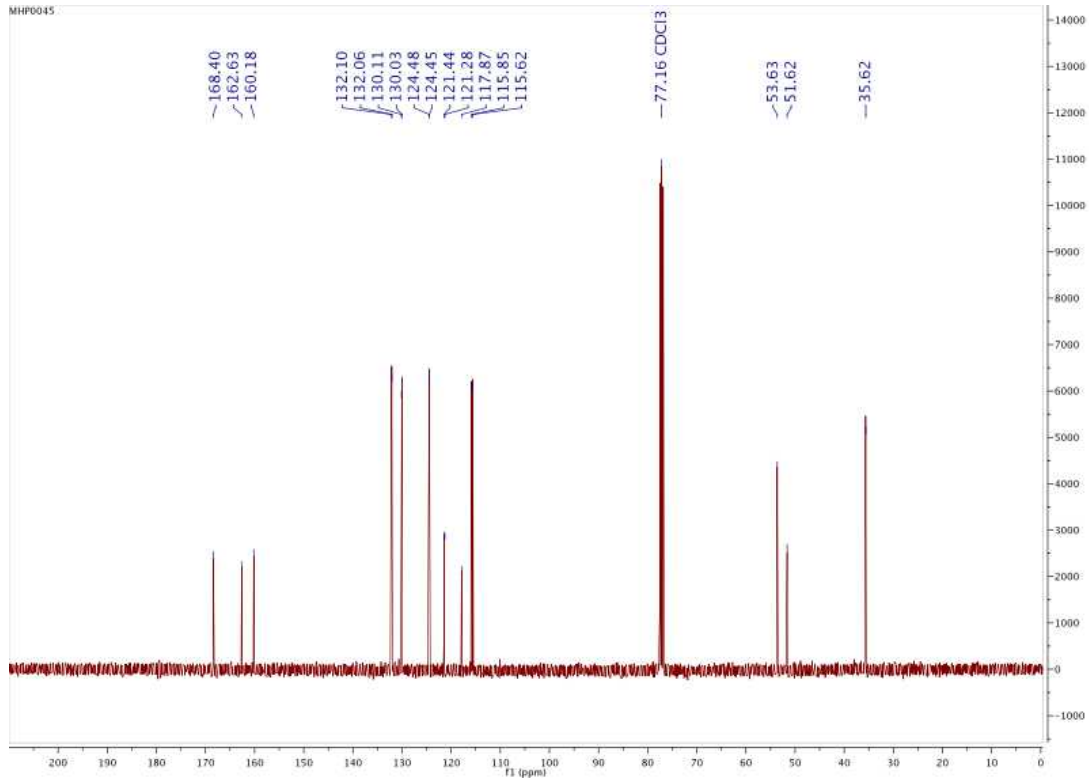

3d

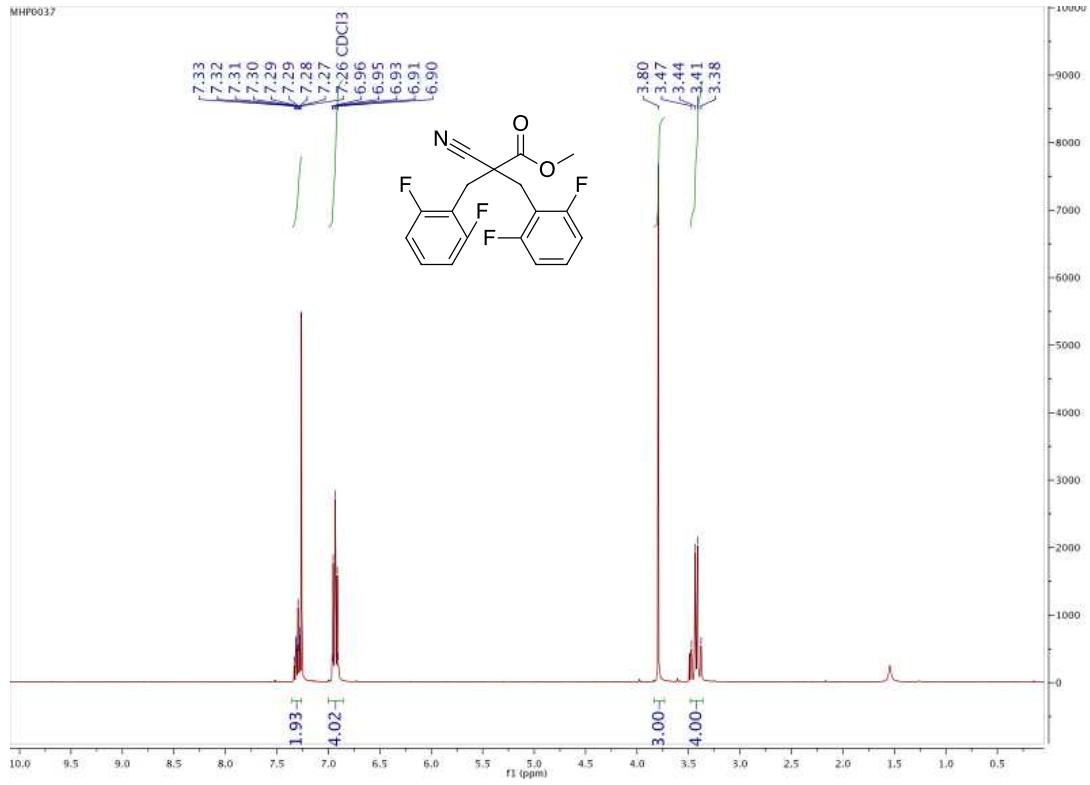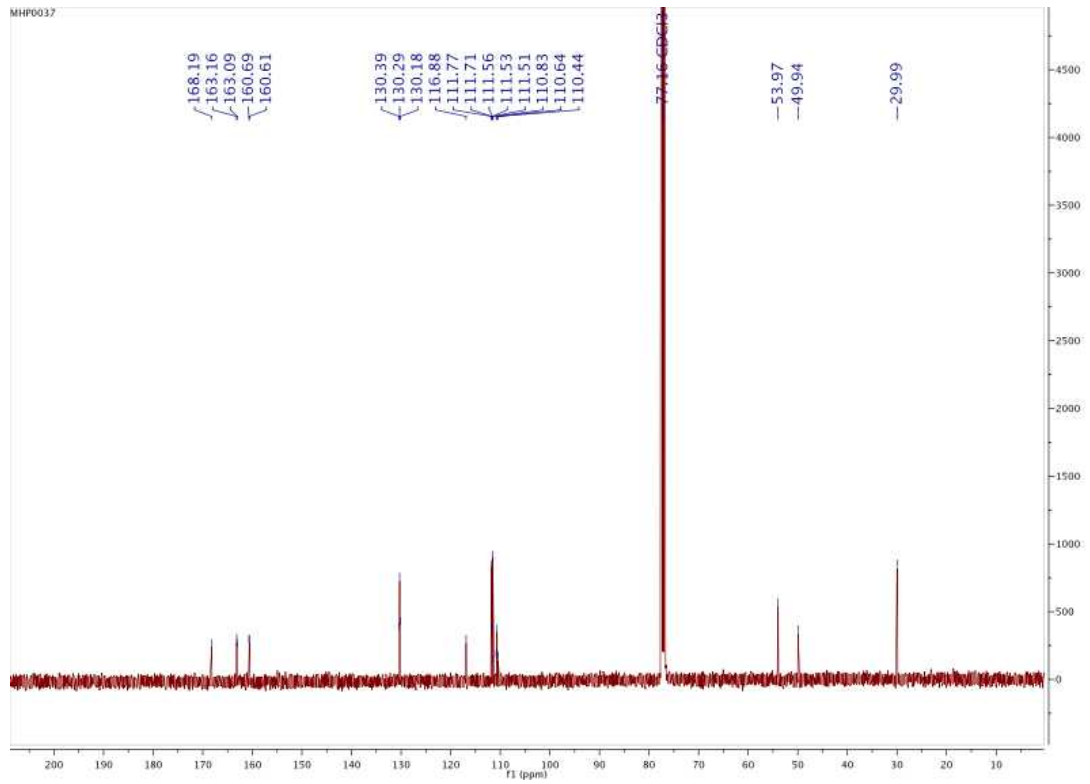

3e

MHP0044

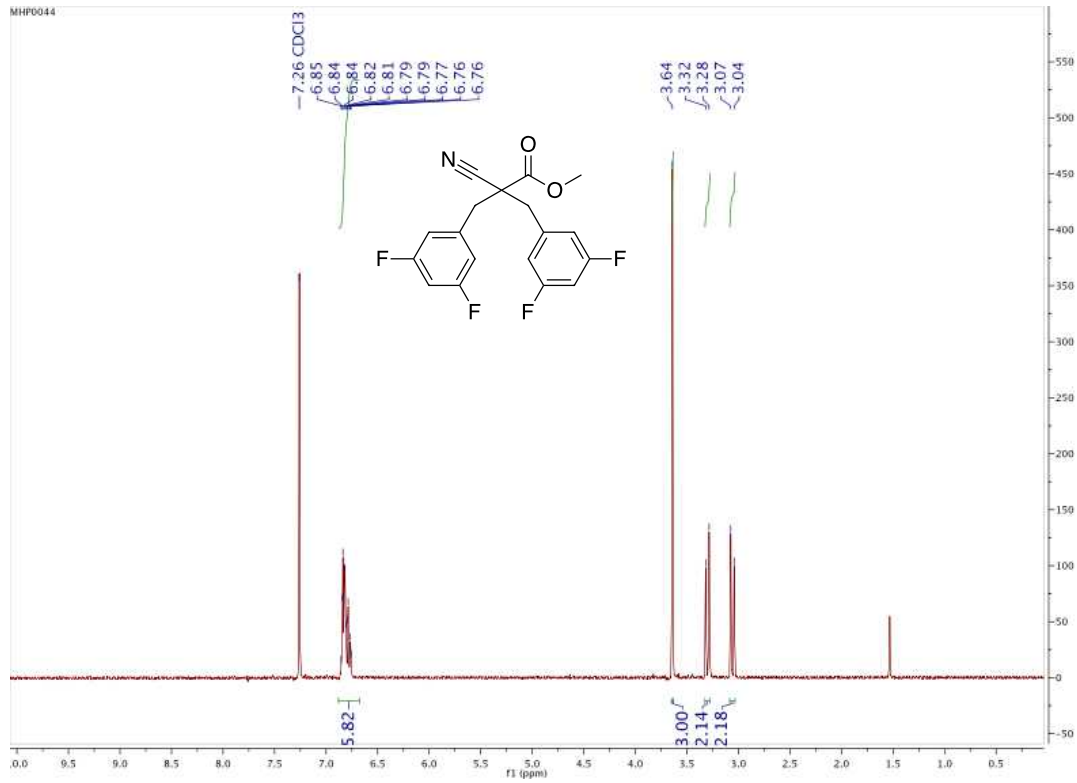

MHP0044

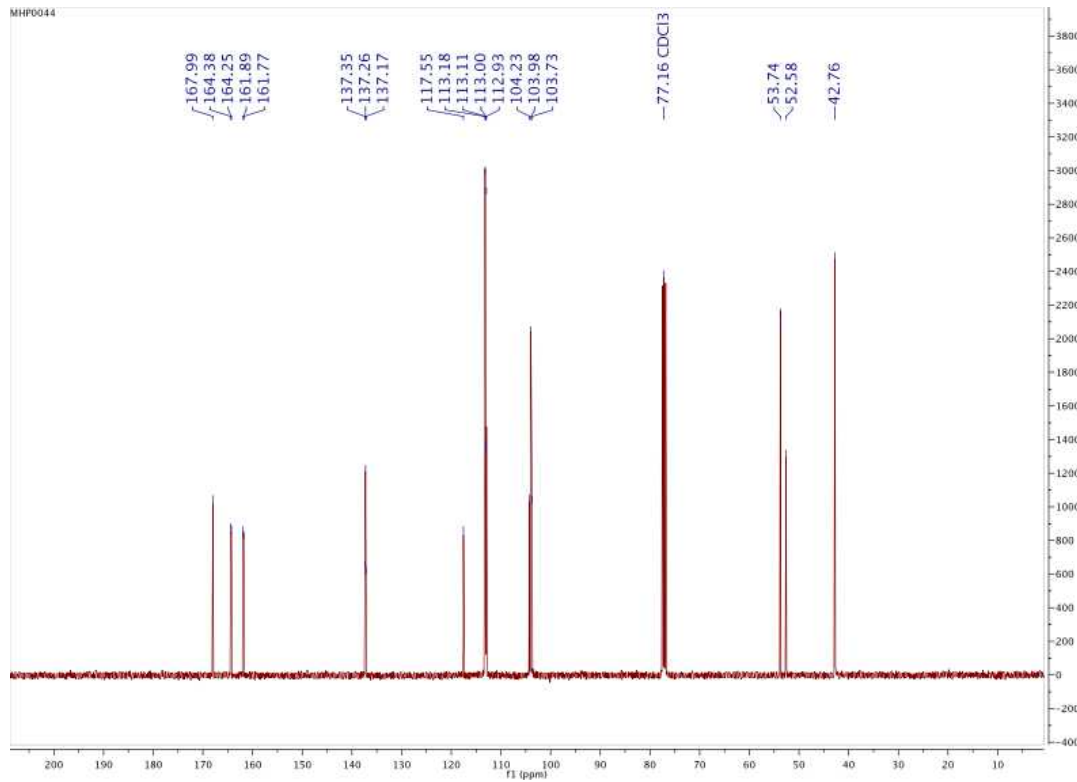

3f

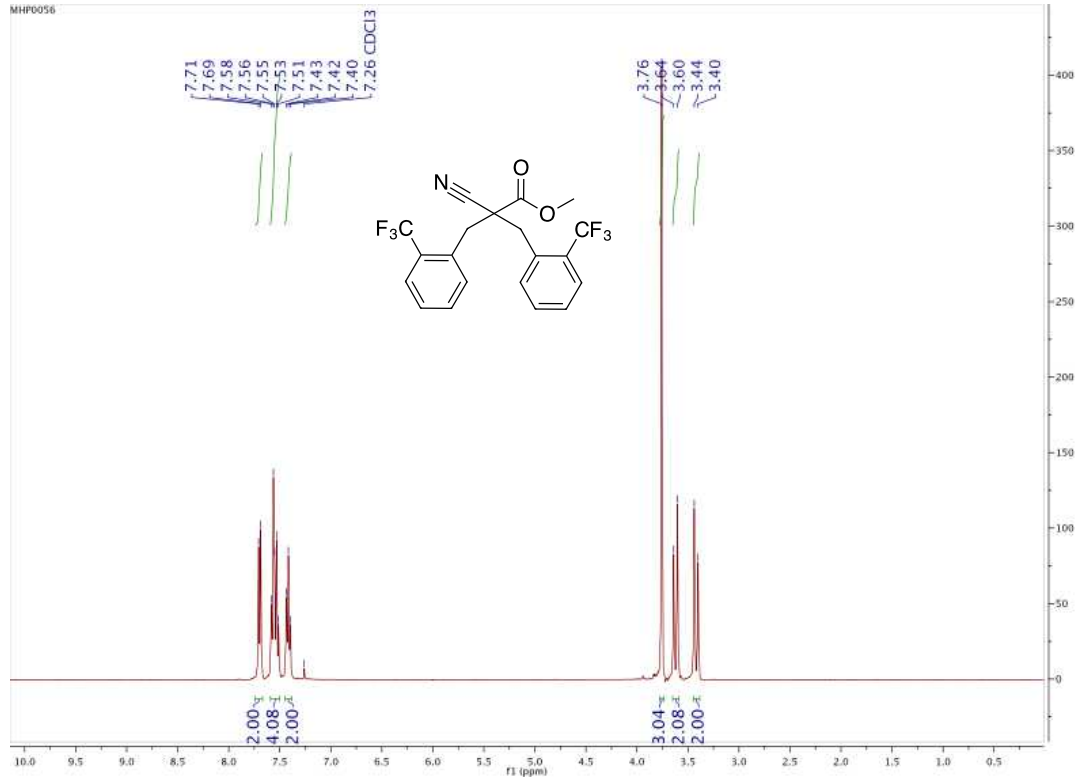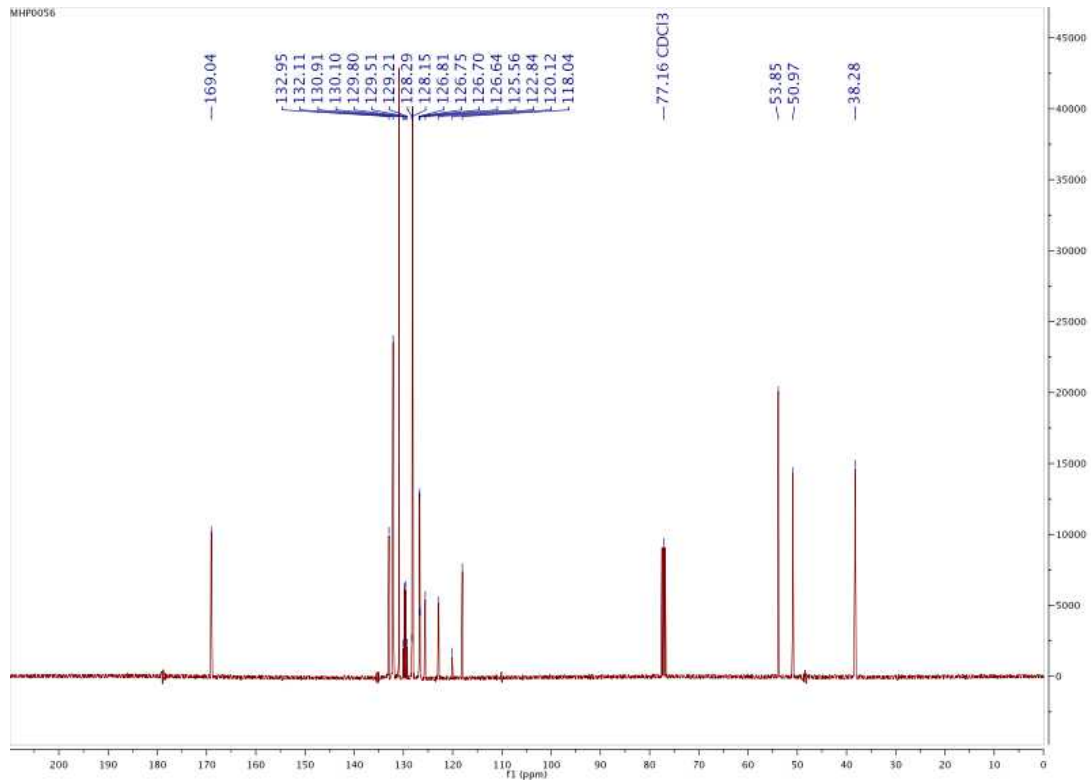

3g

MHP00p-CF3

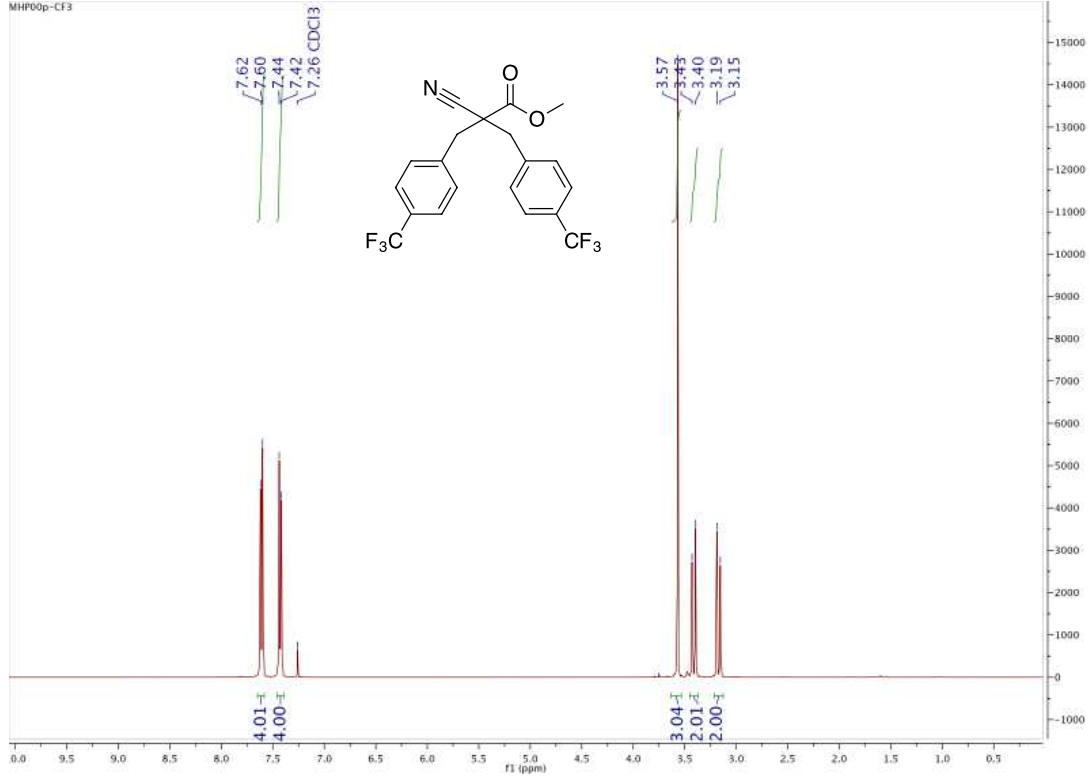

MHP00p-CF3

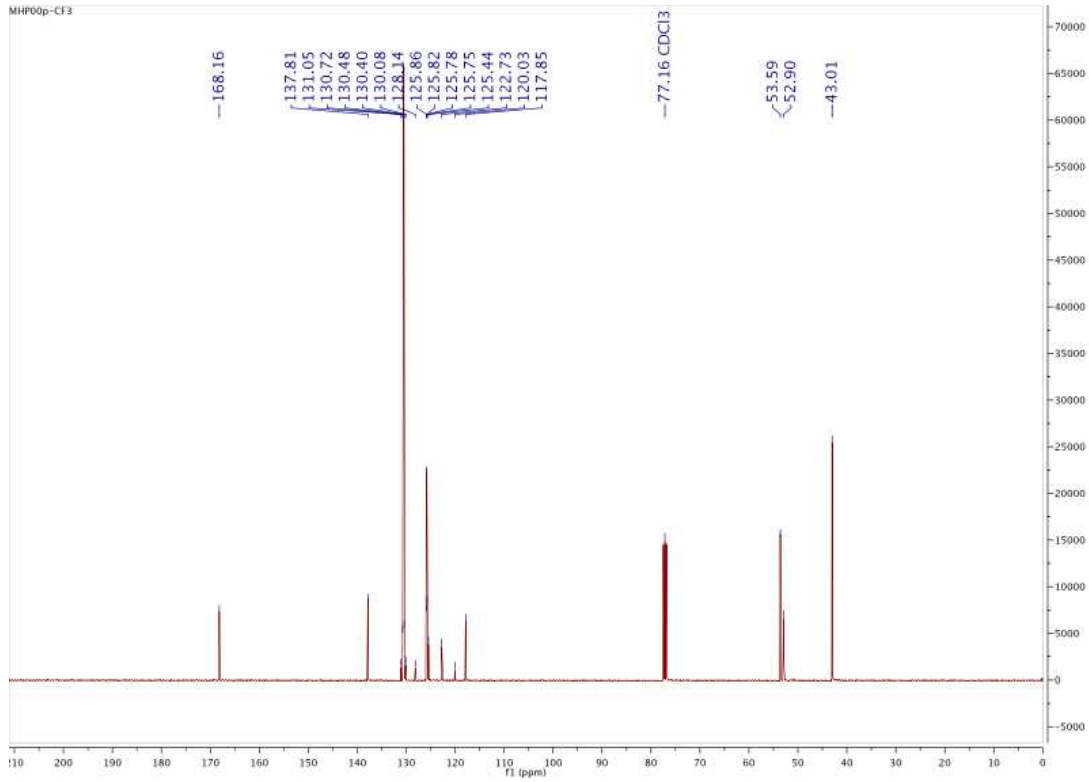



3h

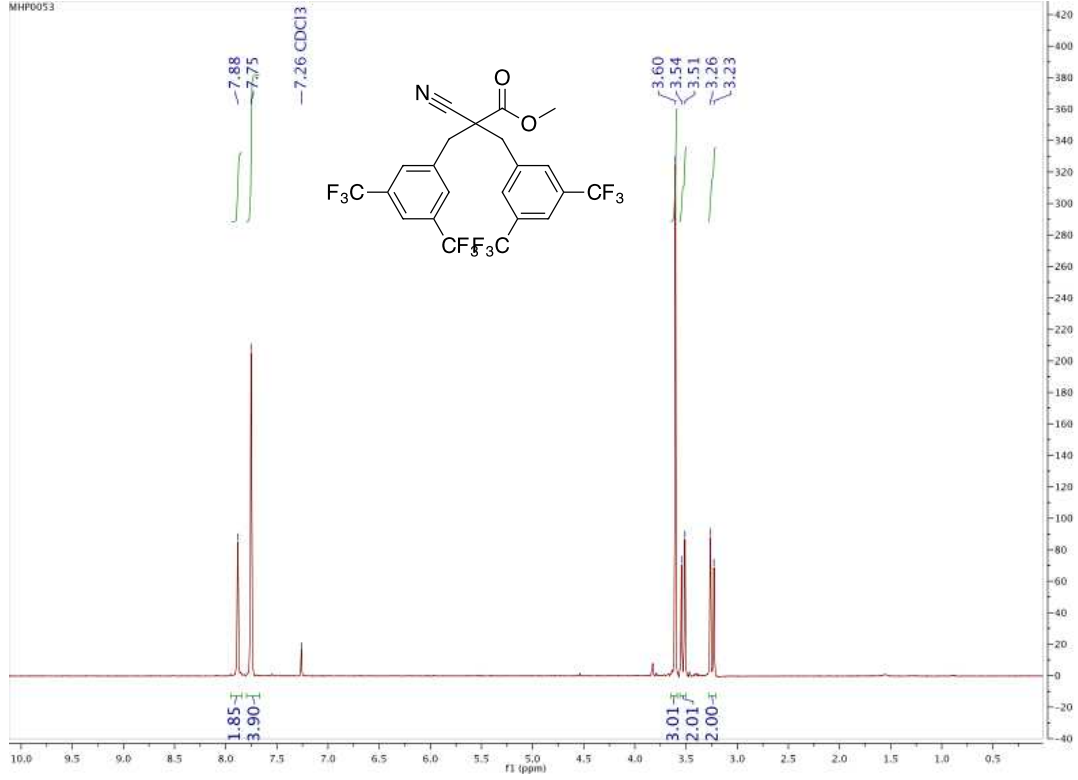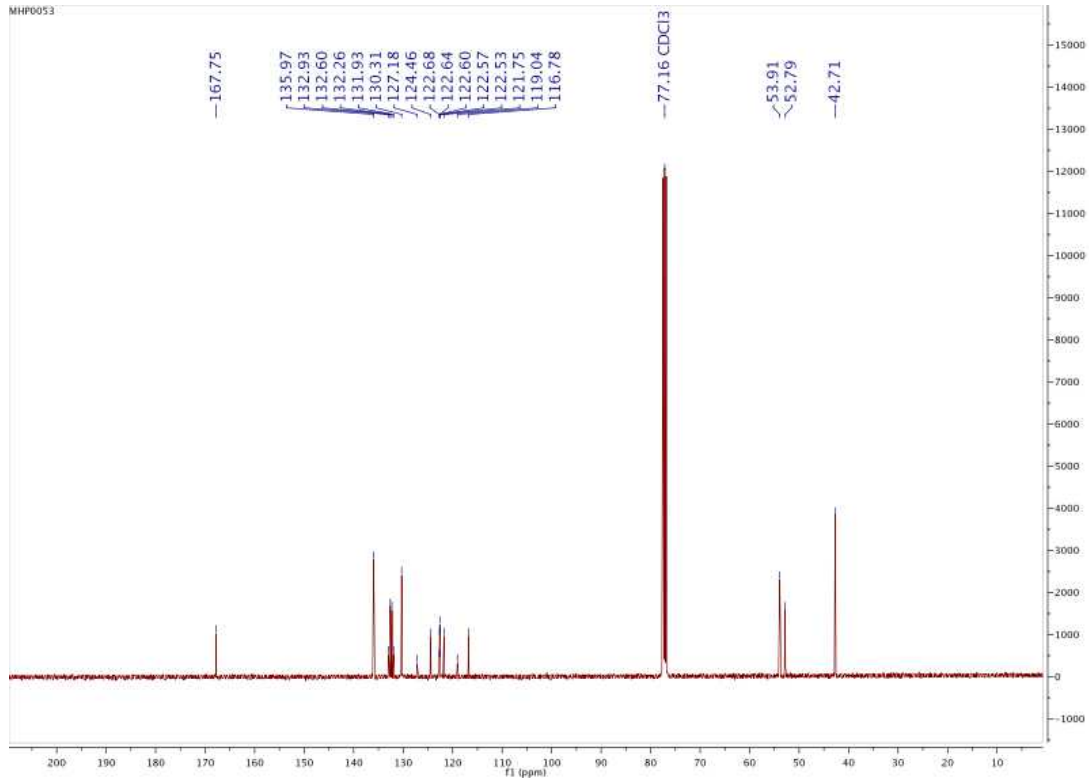

3i

PROTON\_cdci3\_T25\_001  
tert-butyl

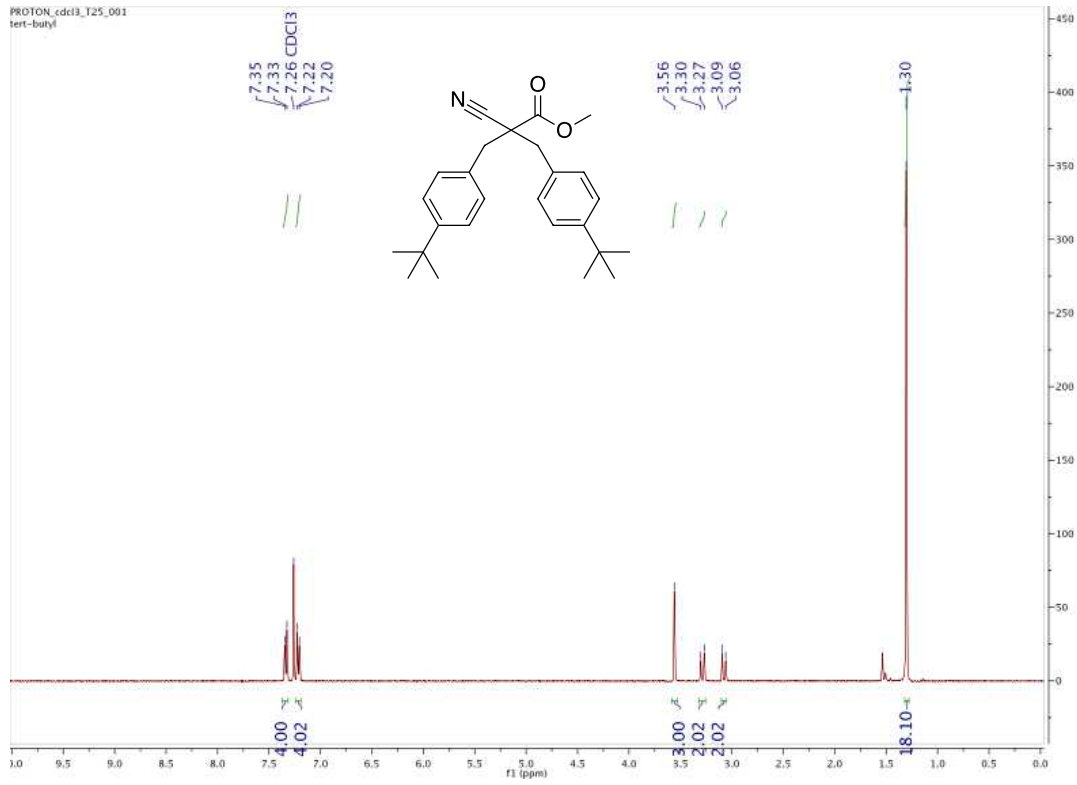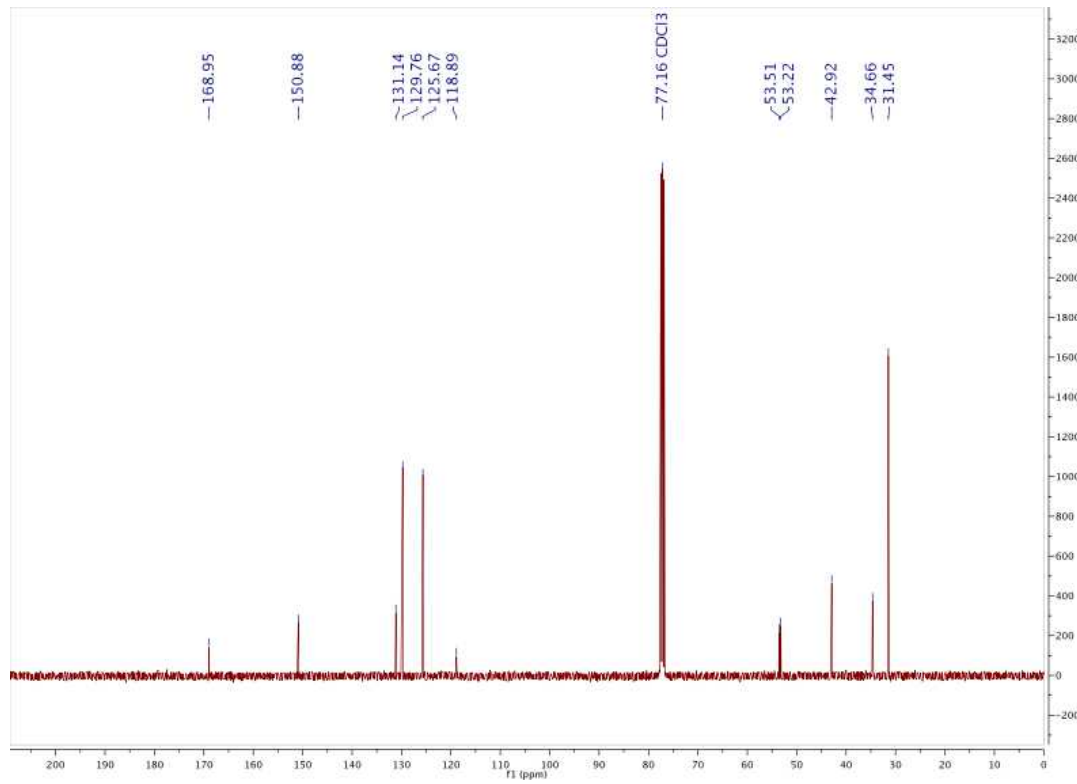

3j

MHPnap.

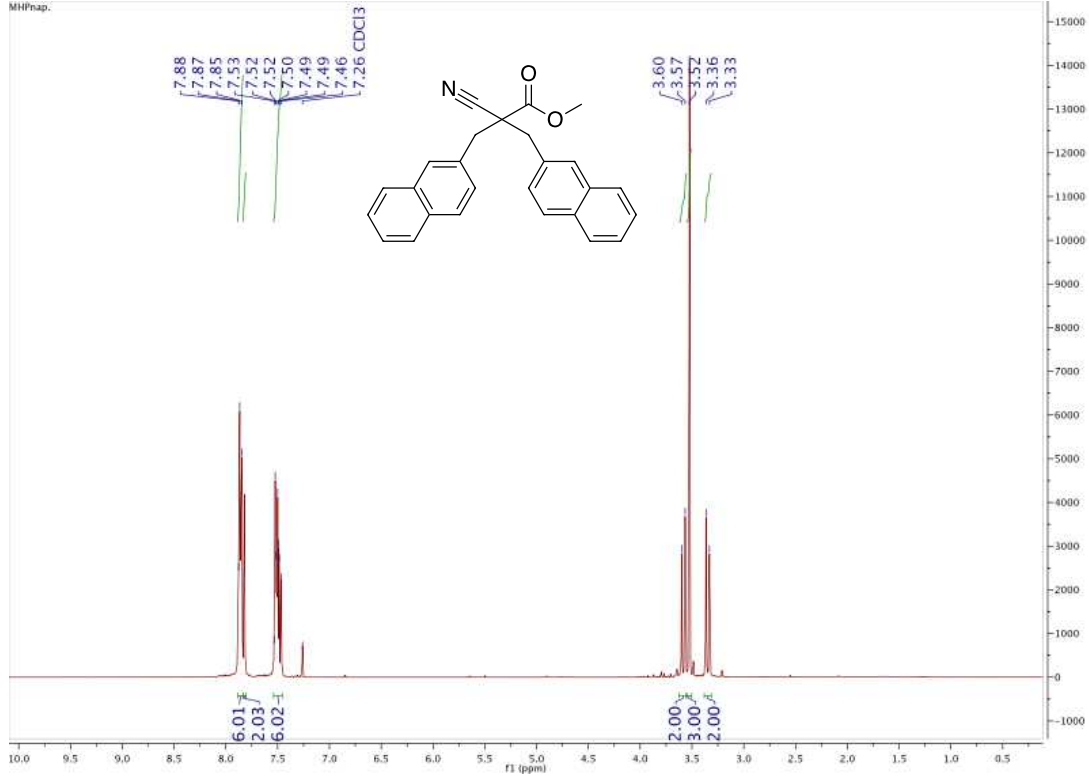

MHPnap.

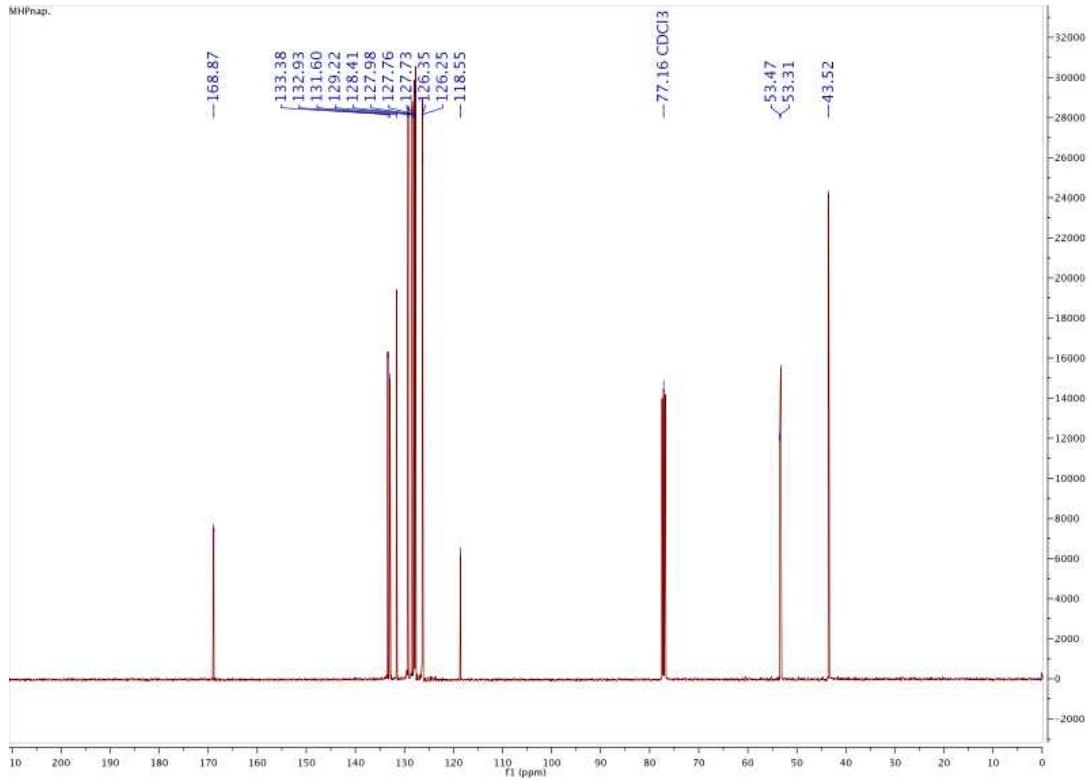

# NMR spectra of 4a-4j

4a

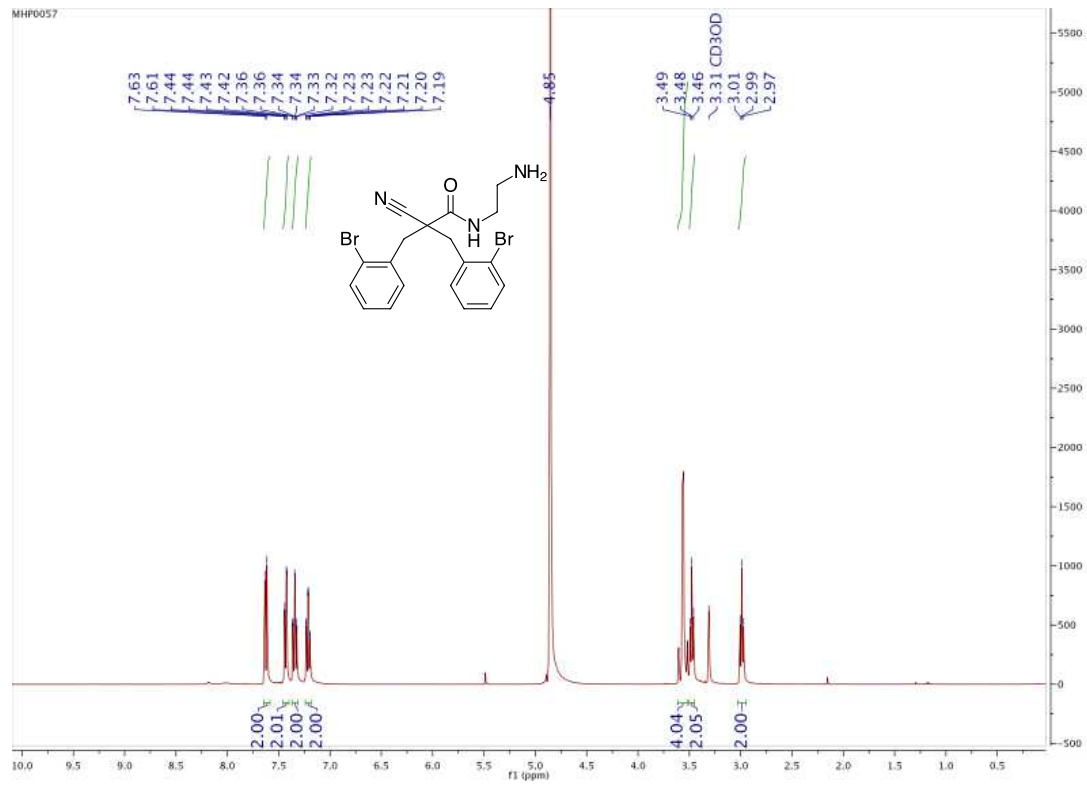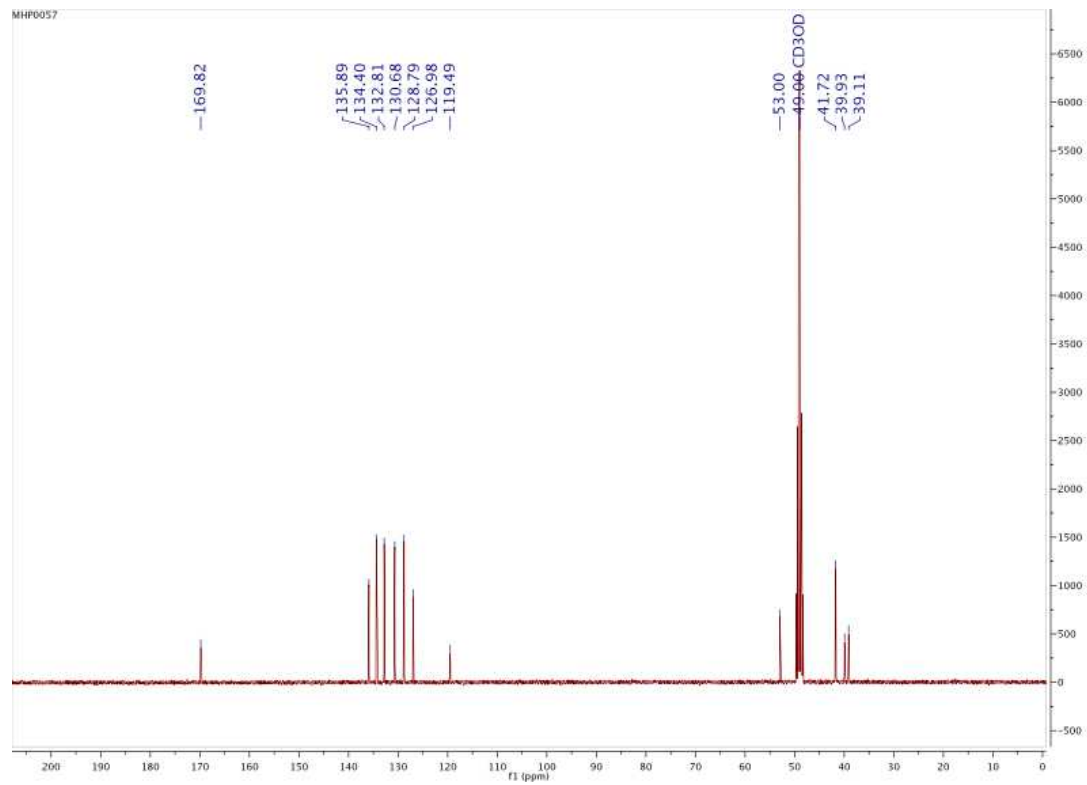

4b

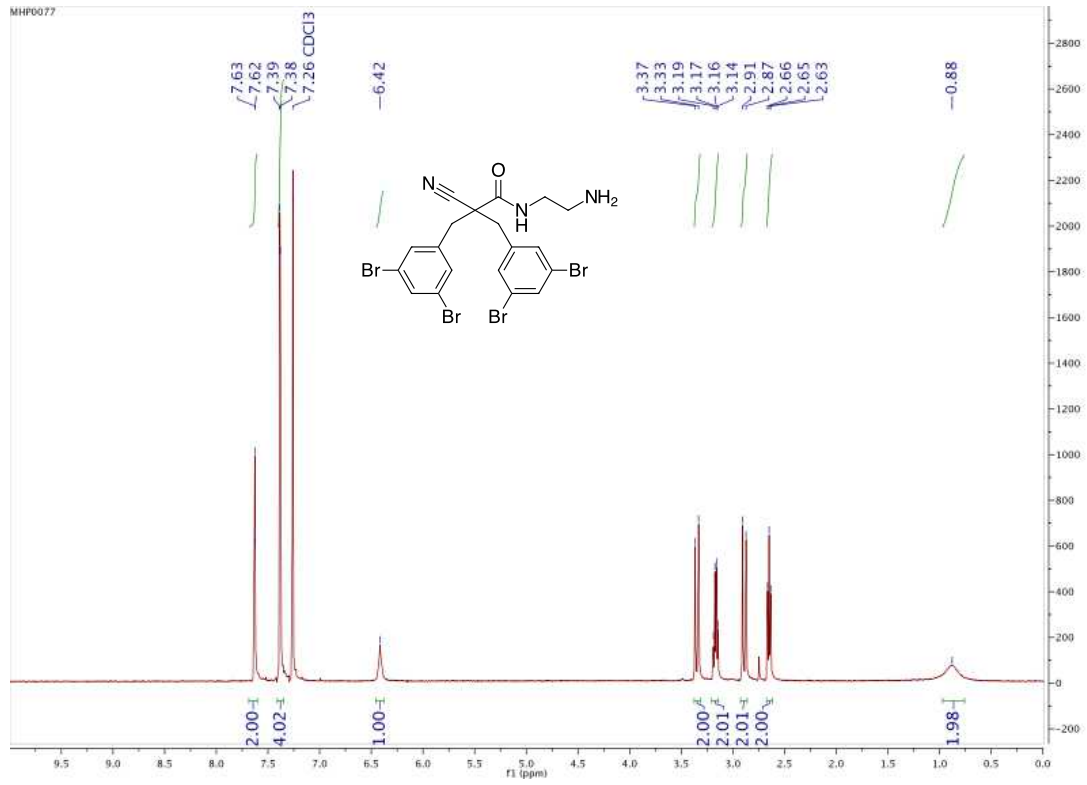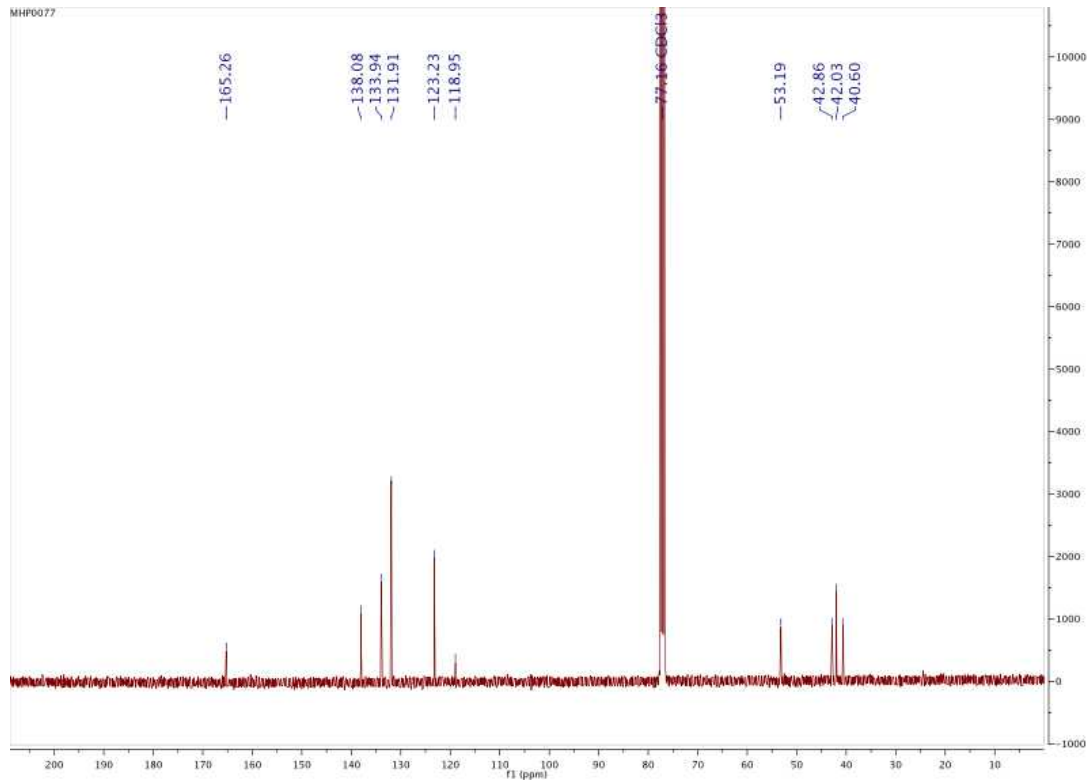

4c

MHP0052

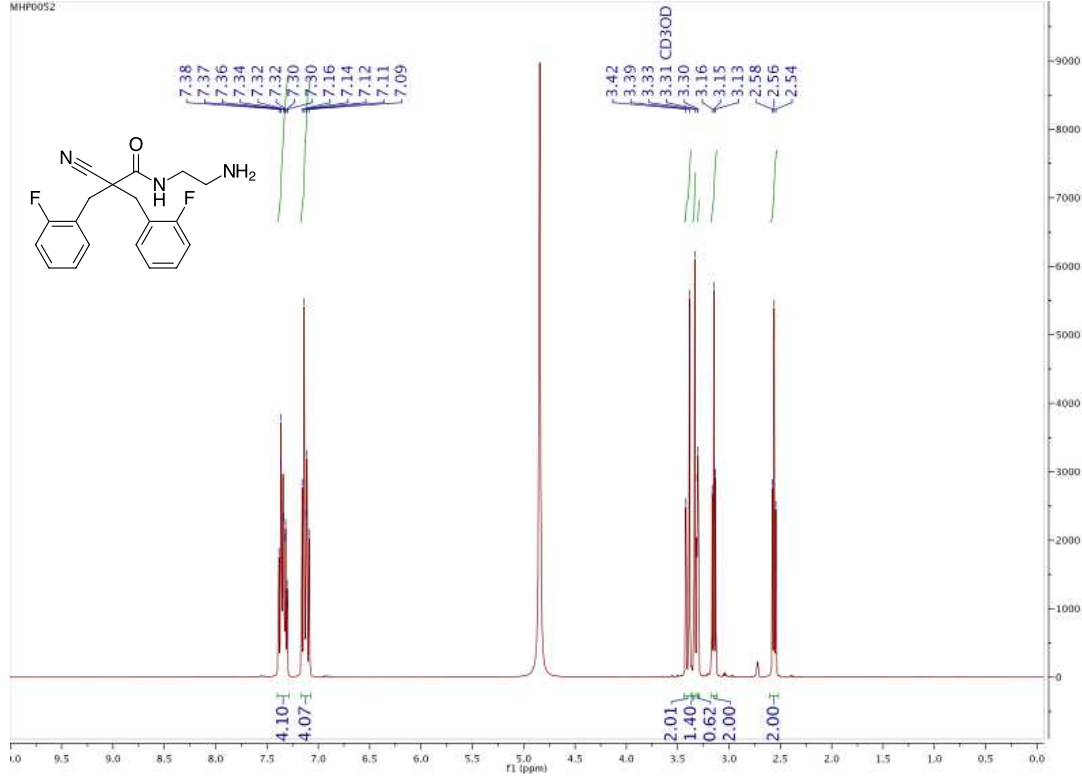

MHP0052

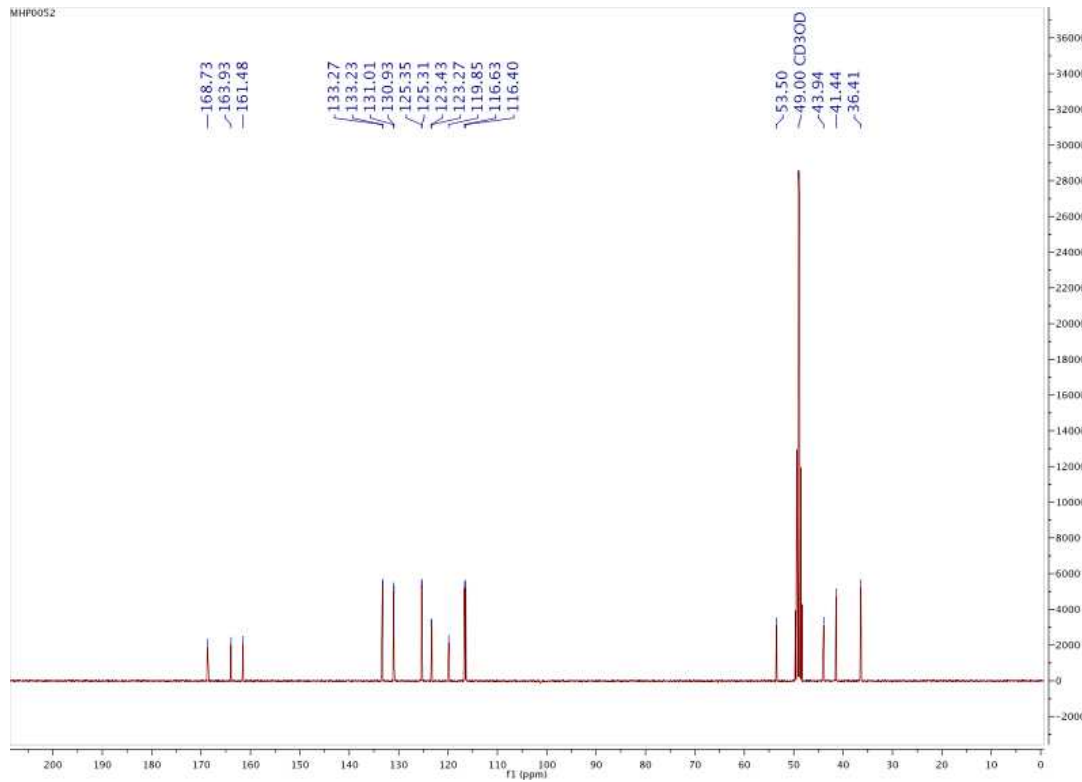

4d

MHP0051

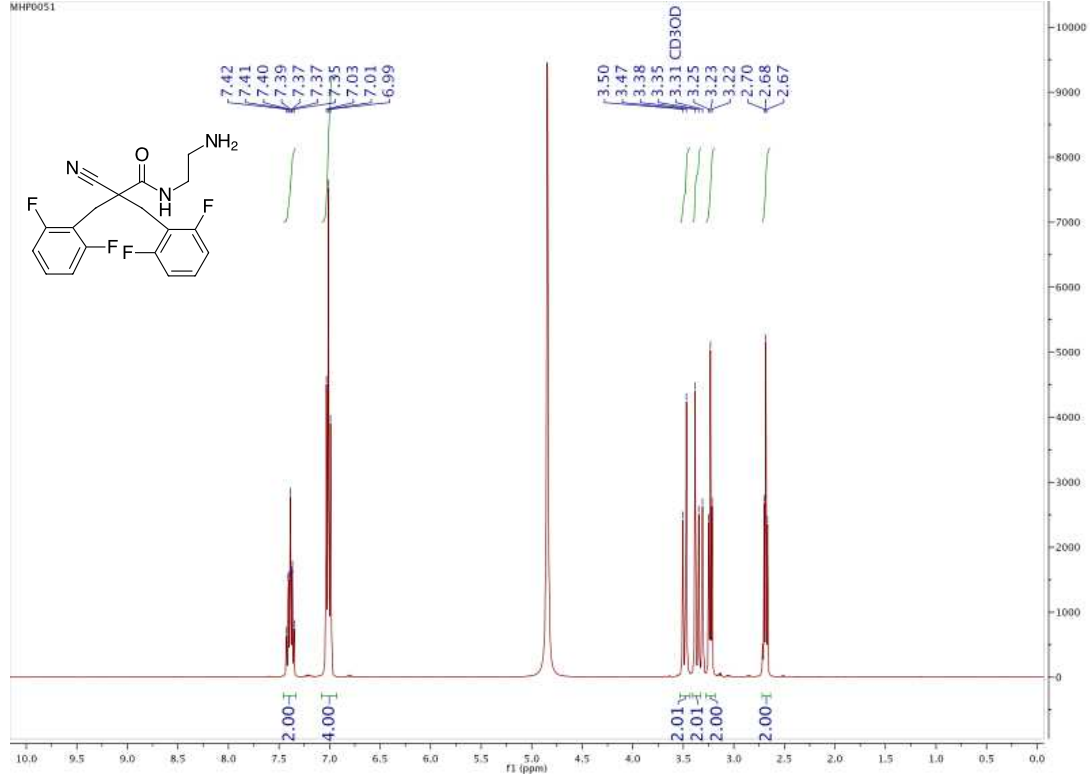

MHP0051

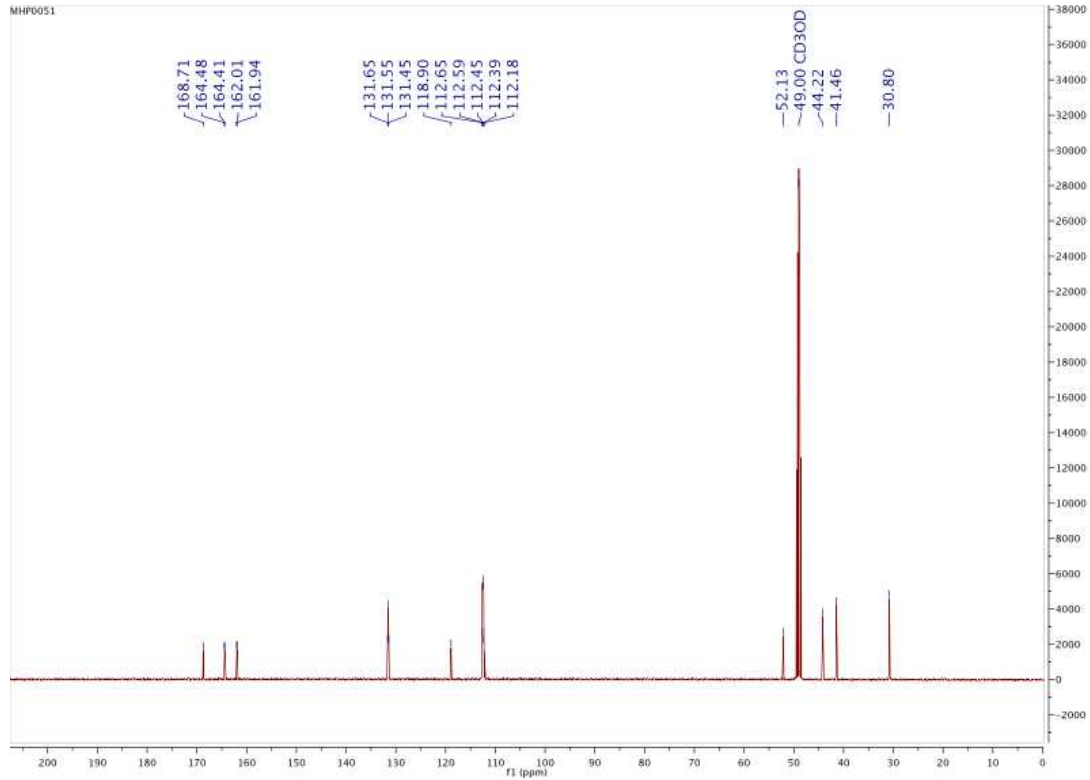

4e

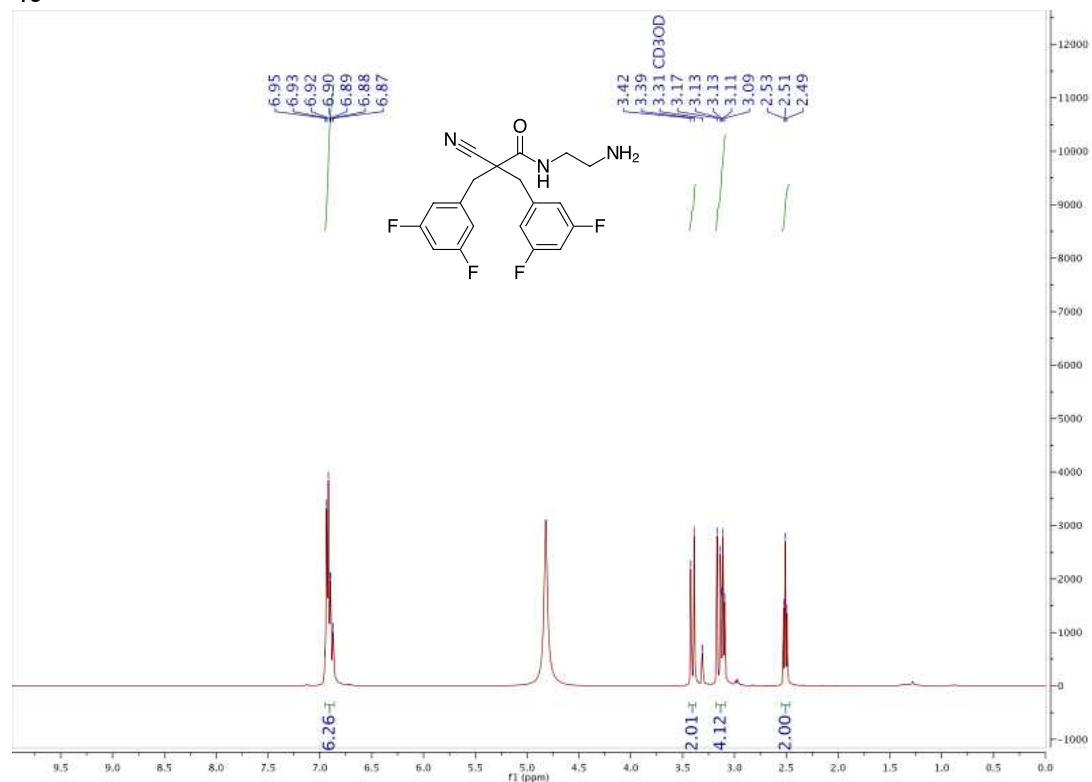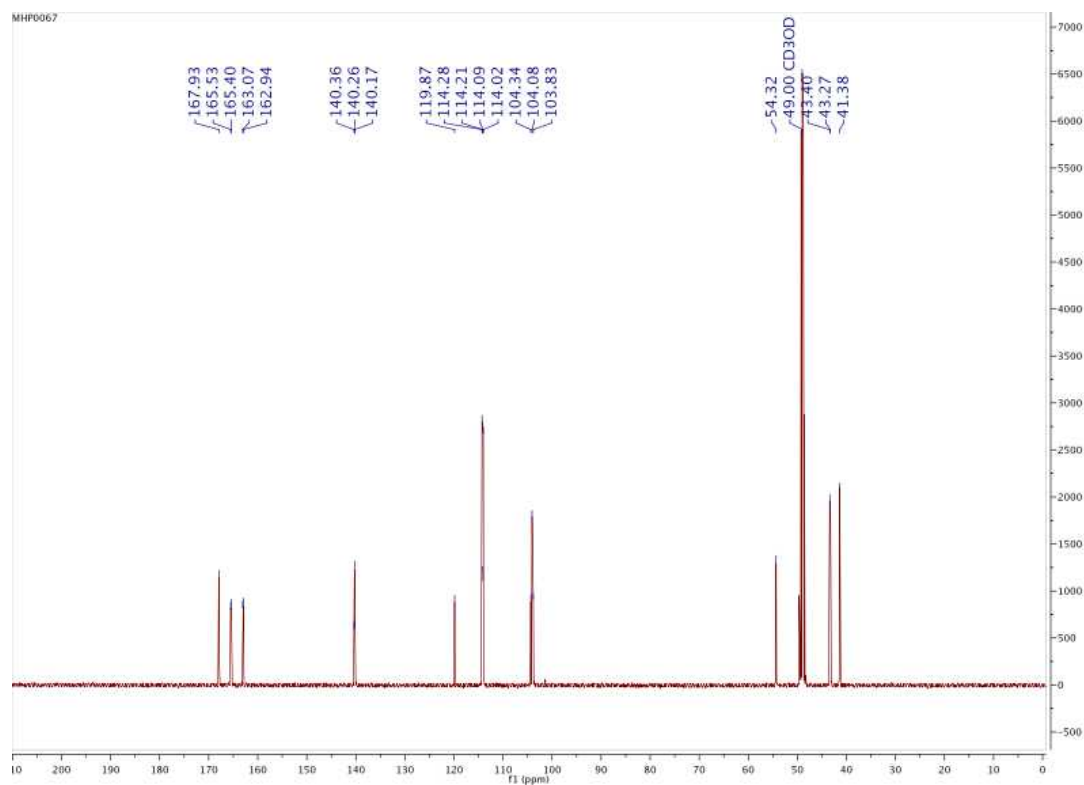



4f

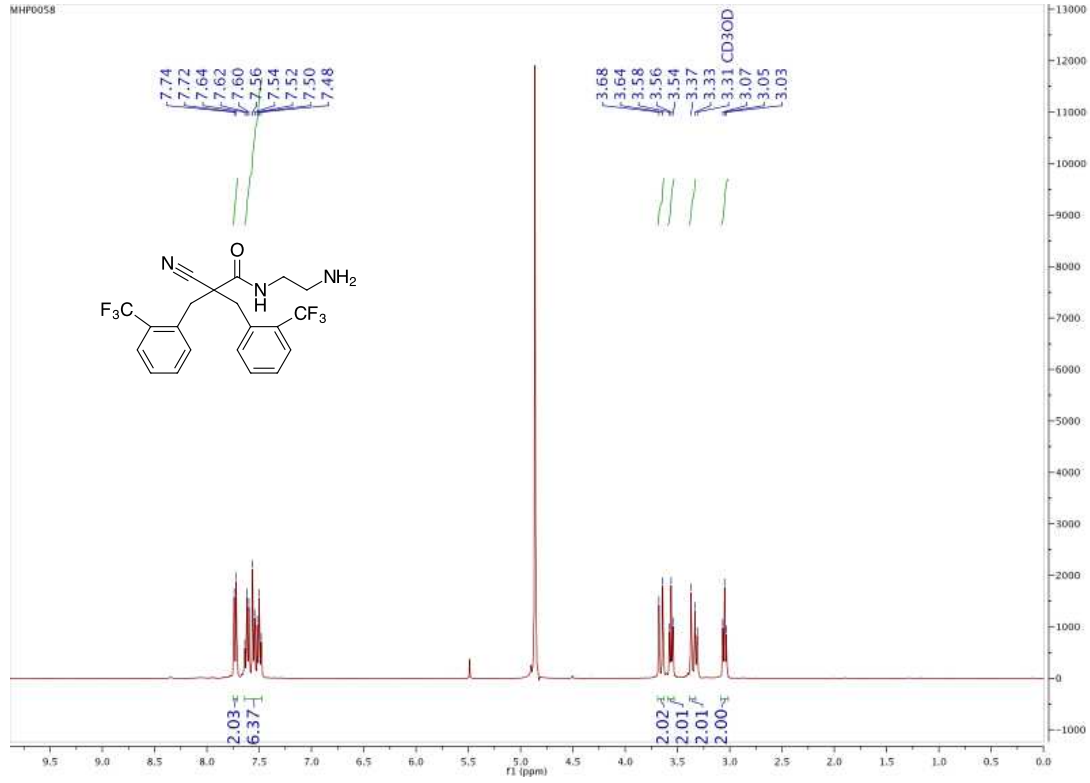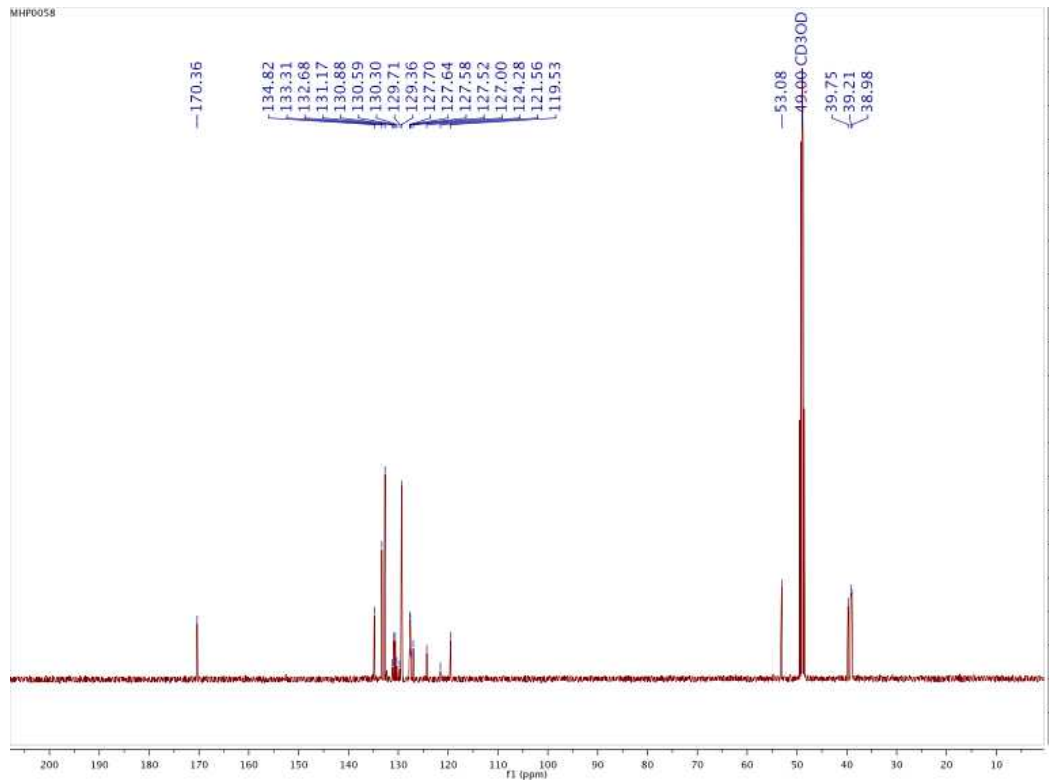

4g

MHPpCF3amid/nitrile

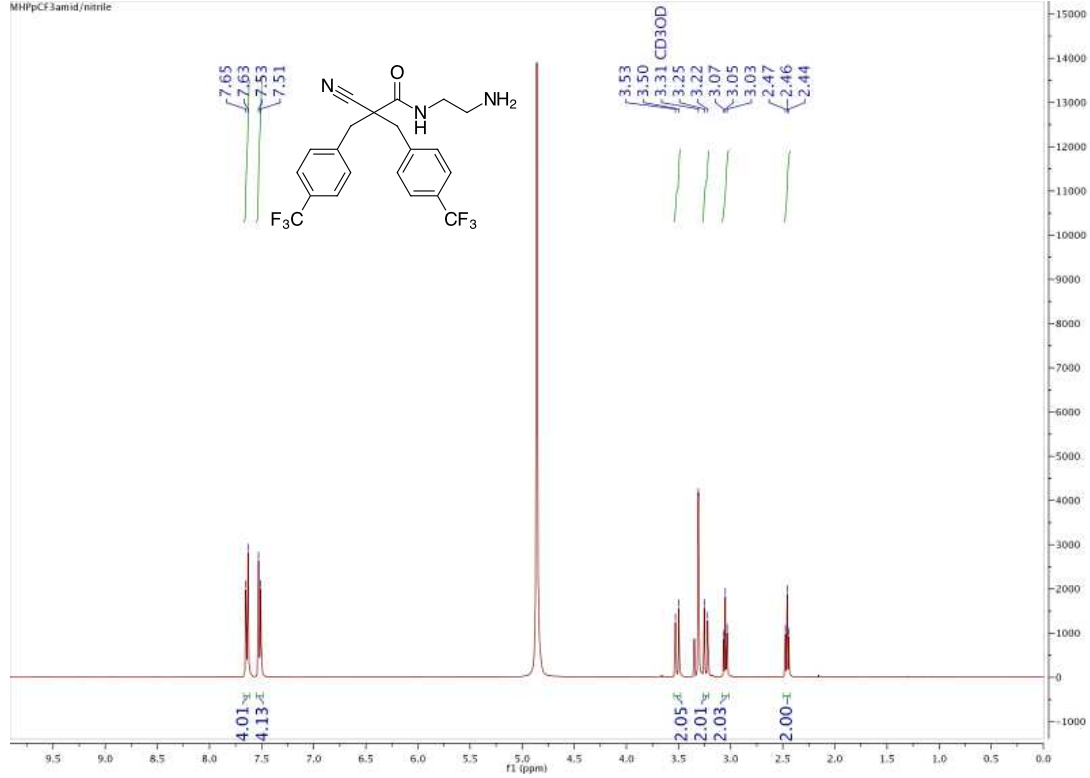

MHPpCF3amid/nitrile

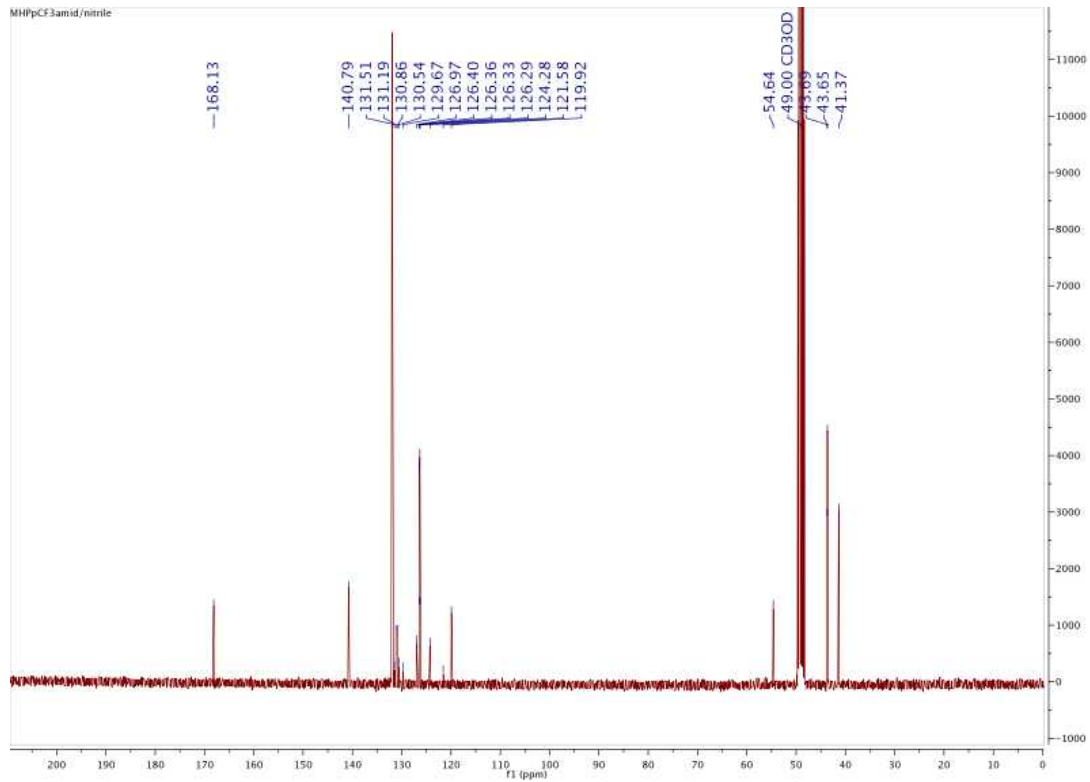

4h

MHP0054

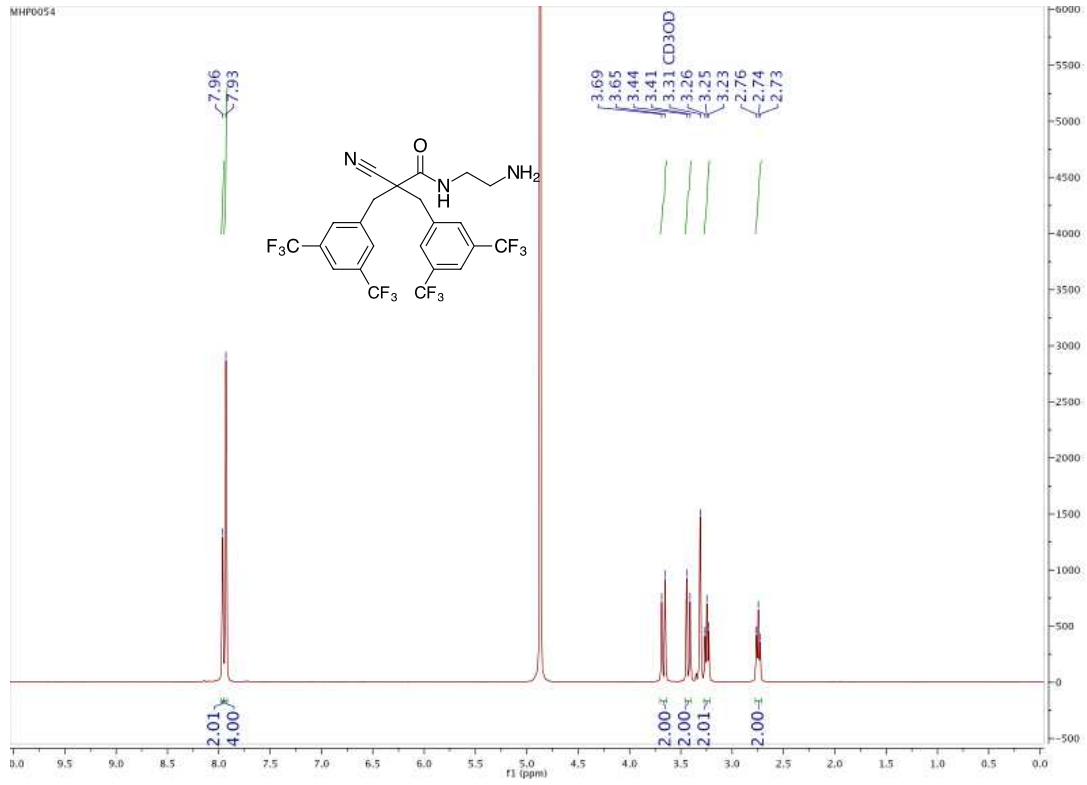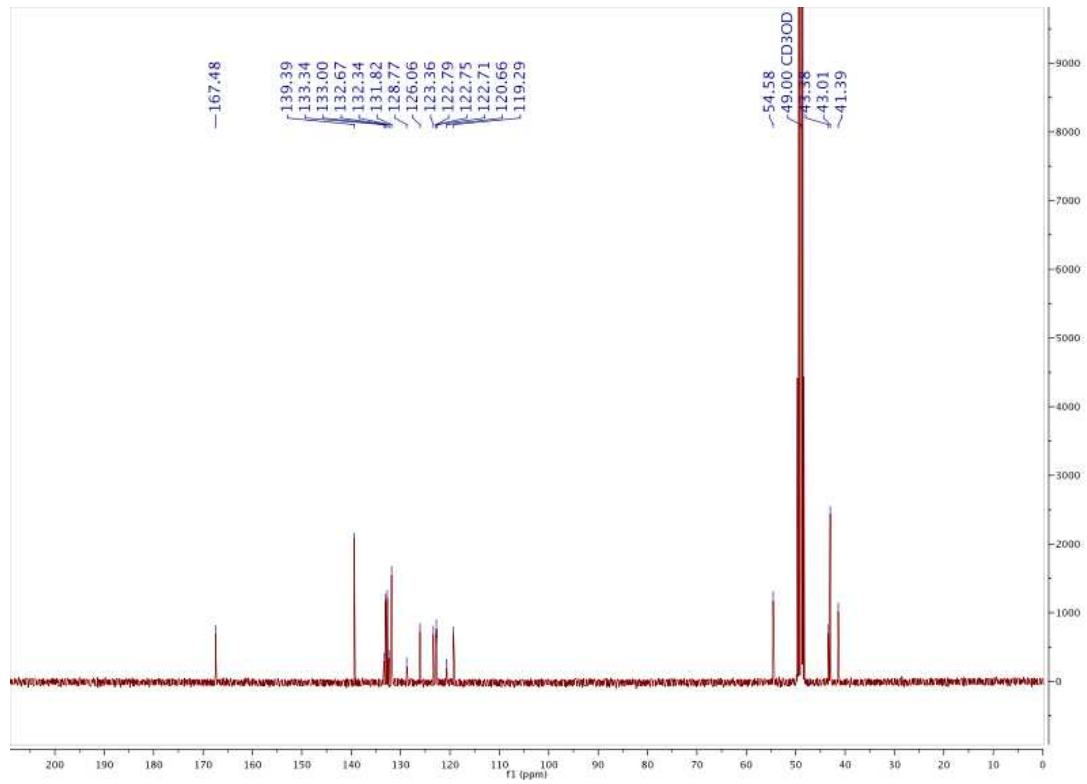

4i

MHP00t-b amid/nitrile

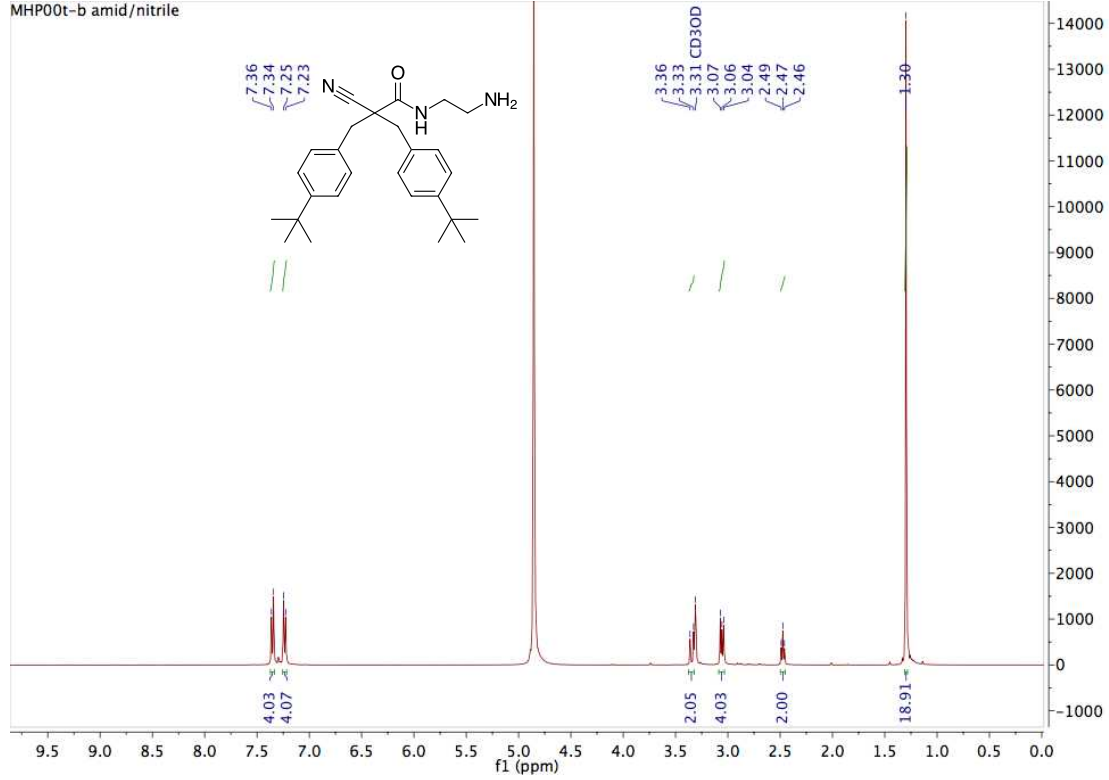

MHP00t-bamidnitrile

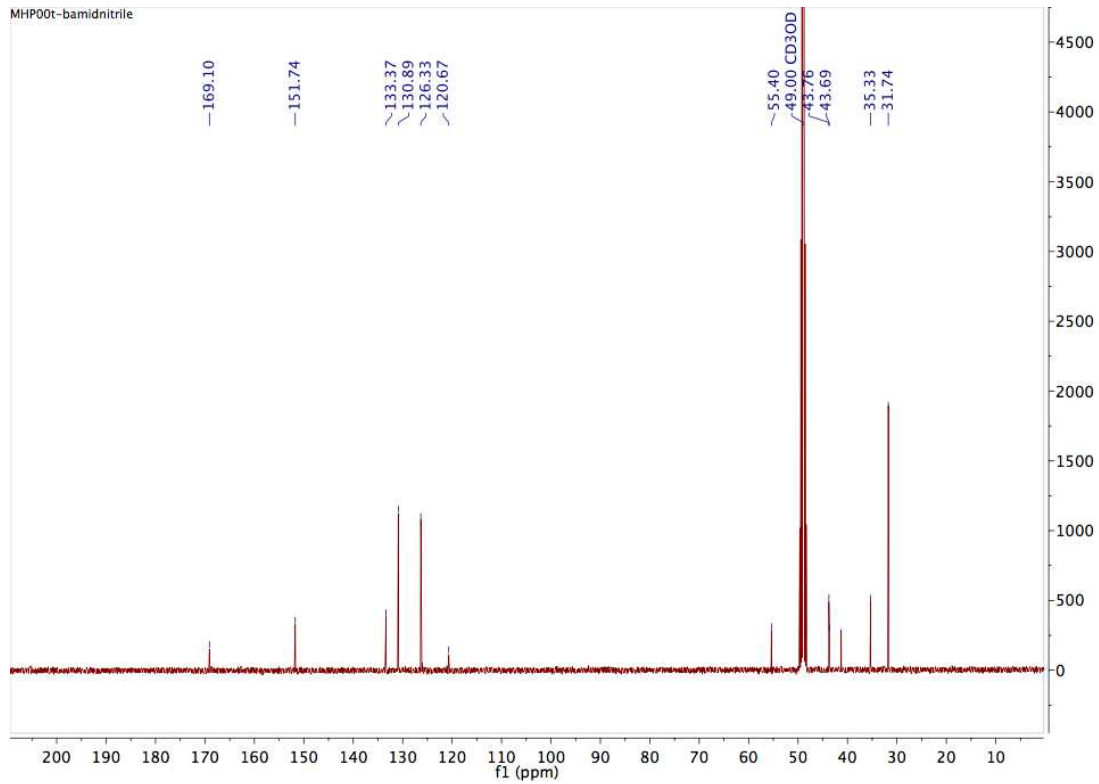

4j

MHP00napamid/nitrile

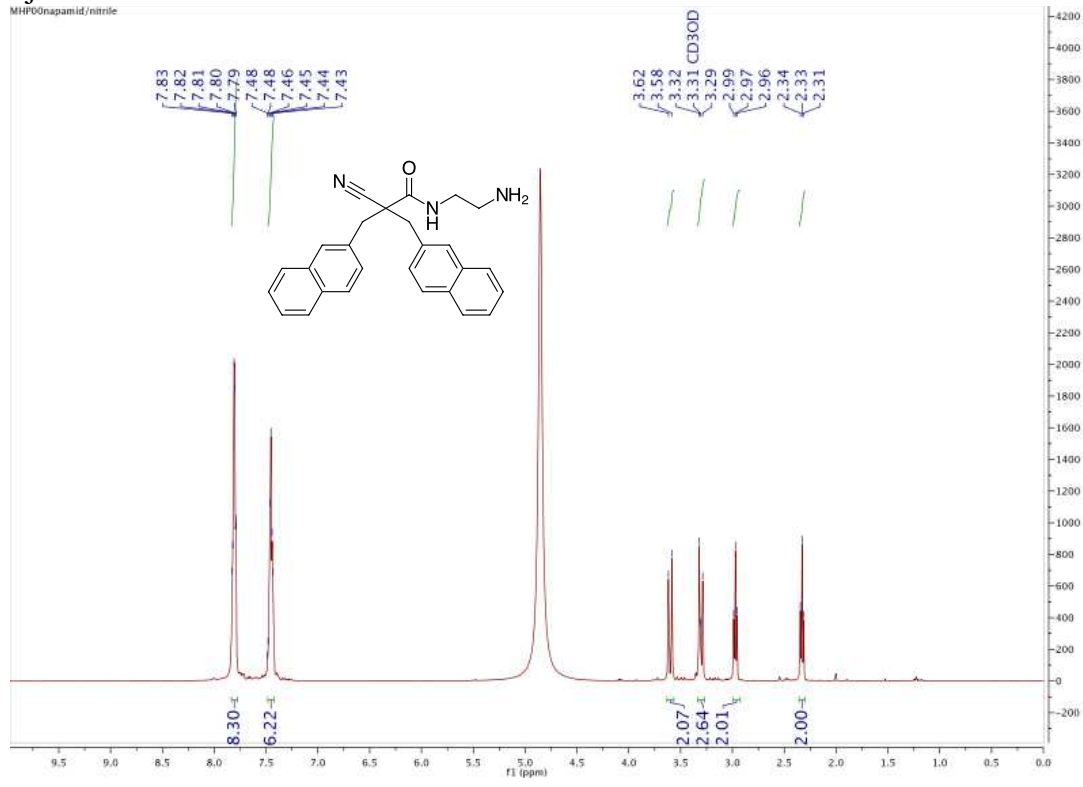

MHP00napamidnitril

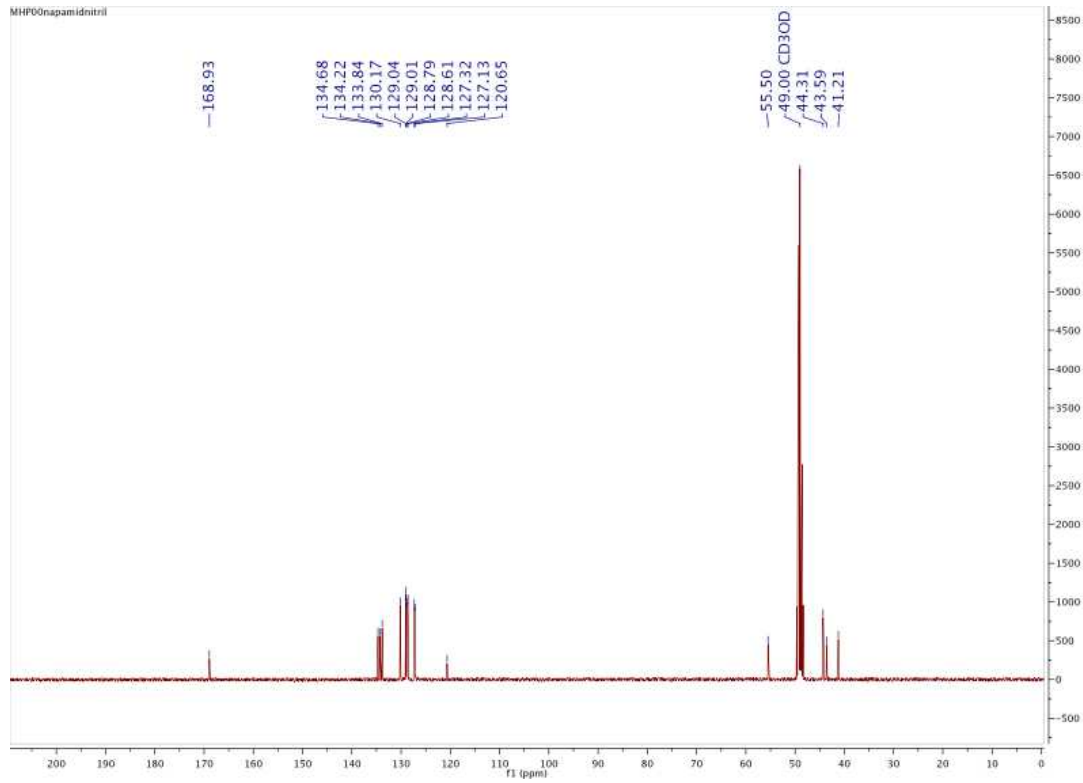

# NMR spectra of 1a-1j

1a

MHP0017

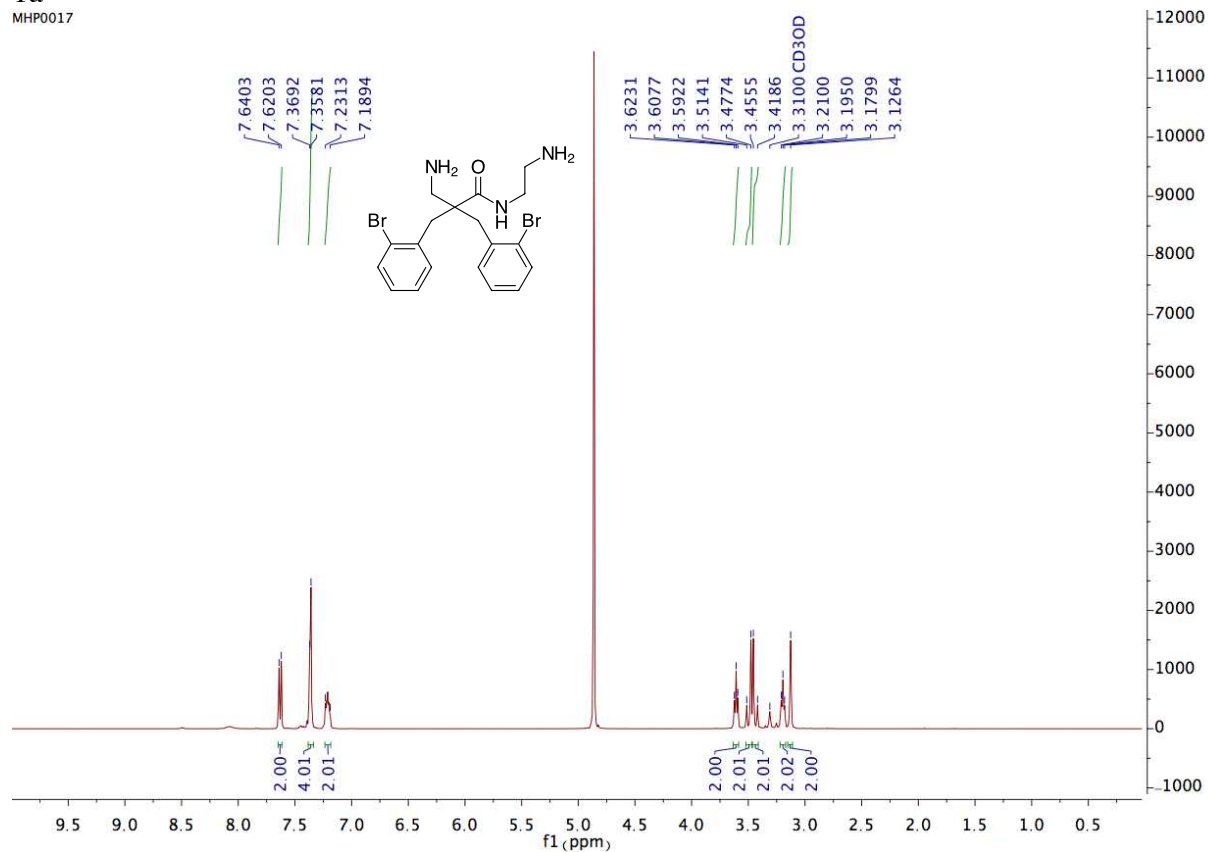

MHP0017C

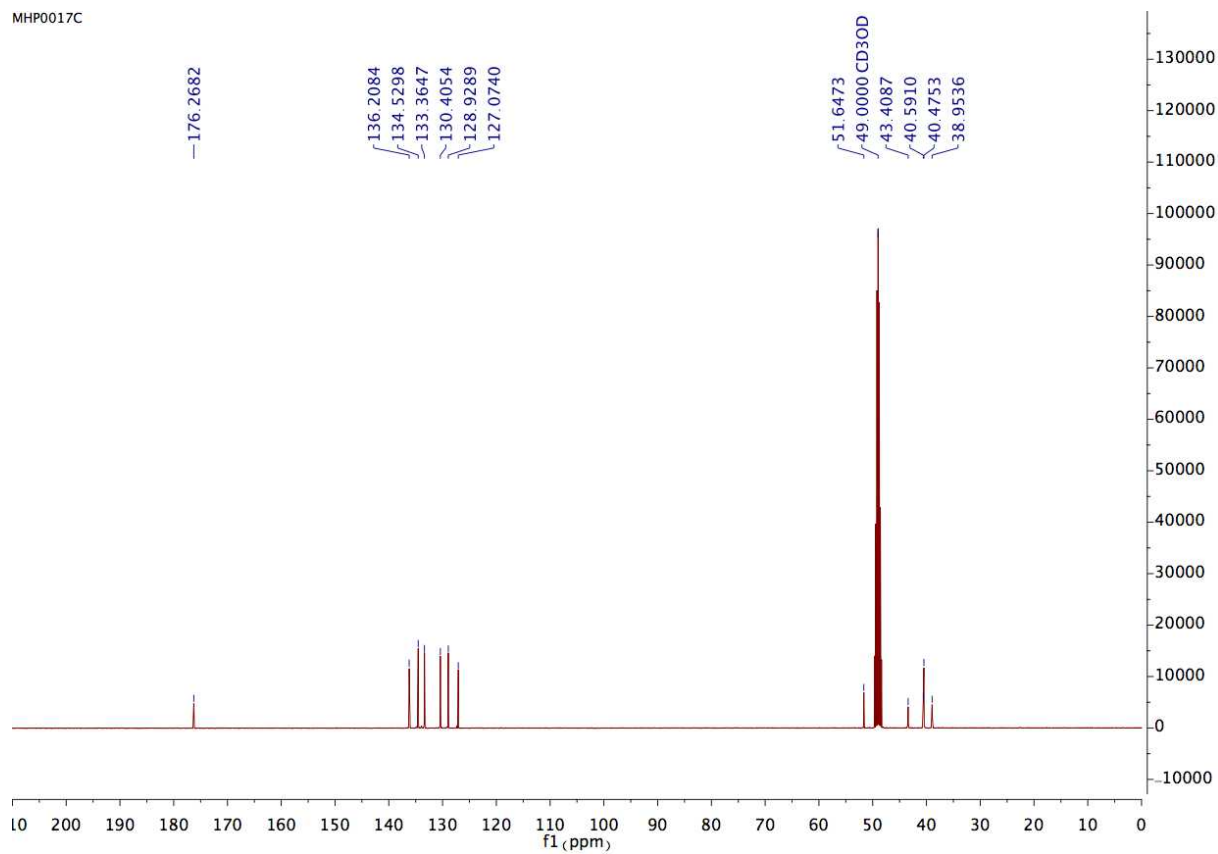

1b

MHP0086

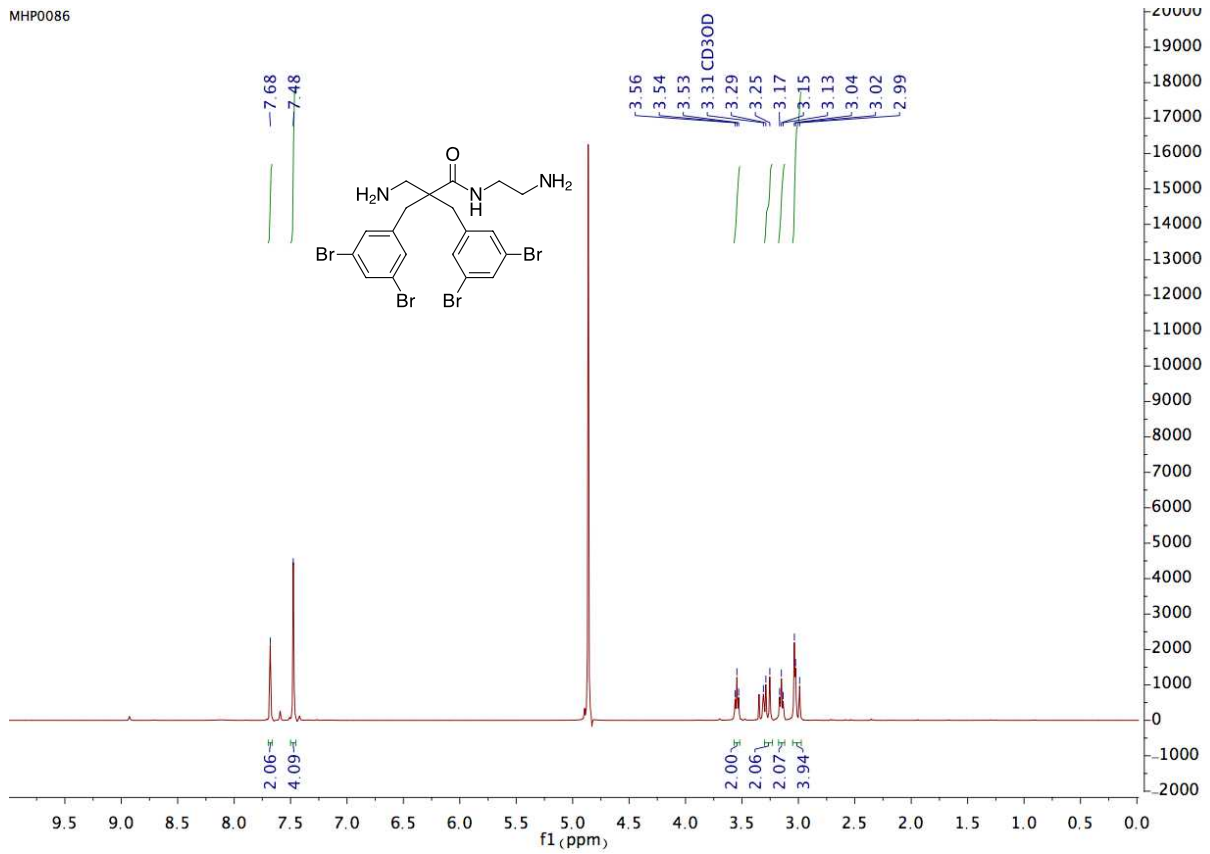

MHP0086C

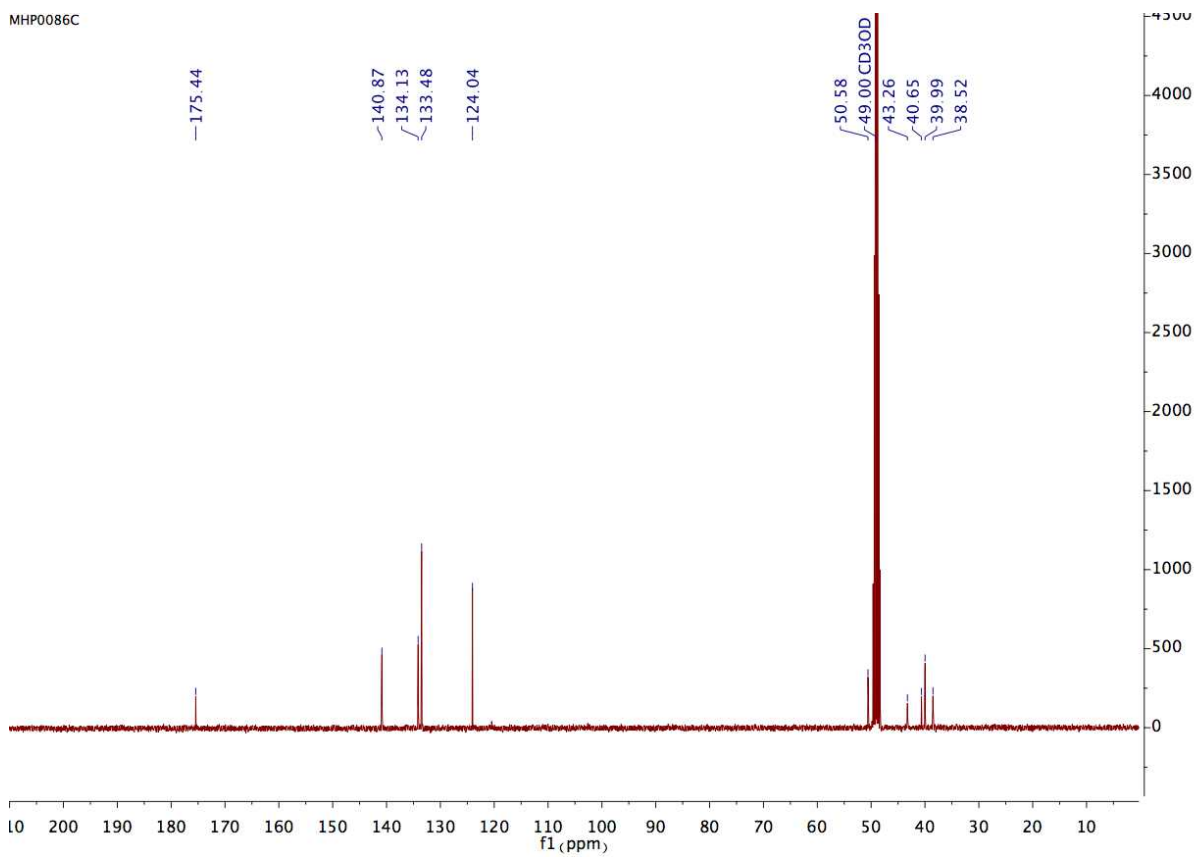

1c

MHP0062HCl

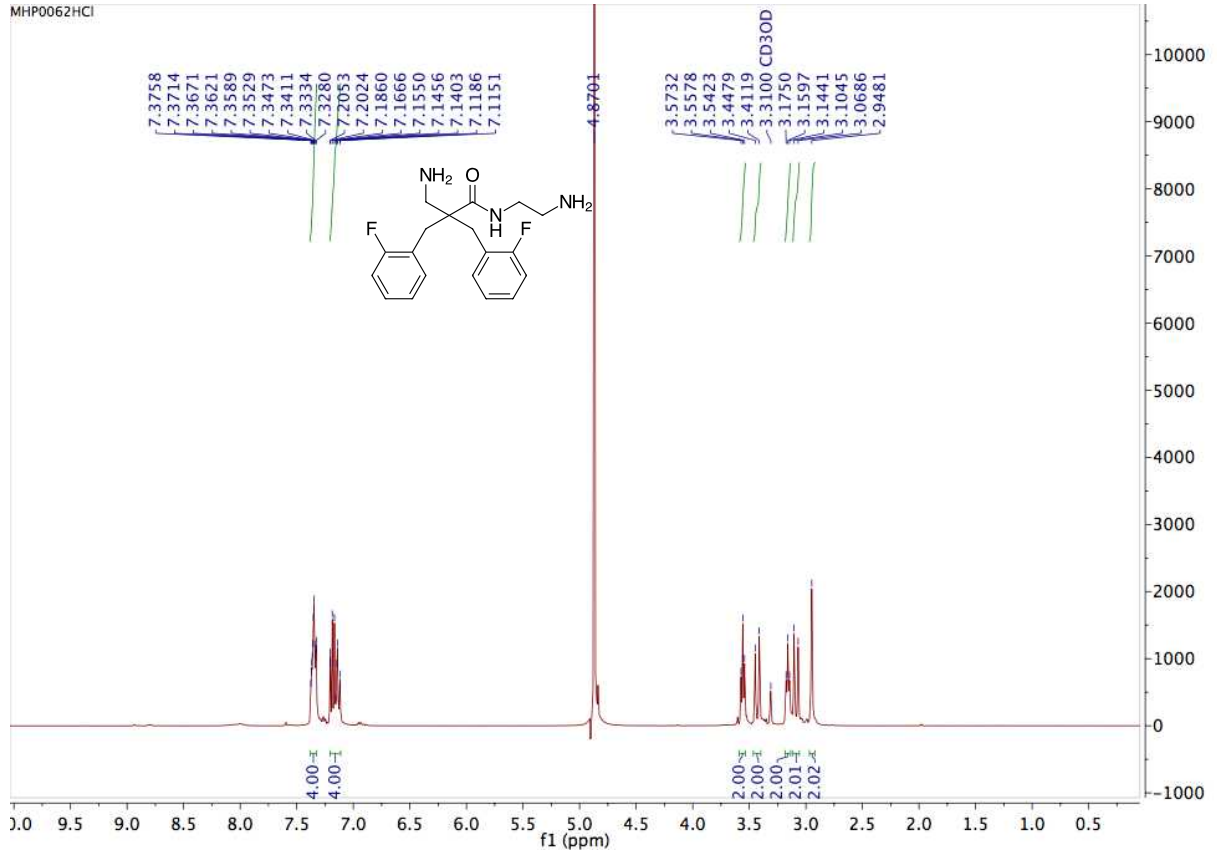

MHP0062C

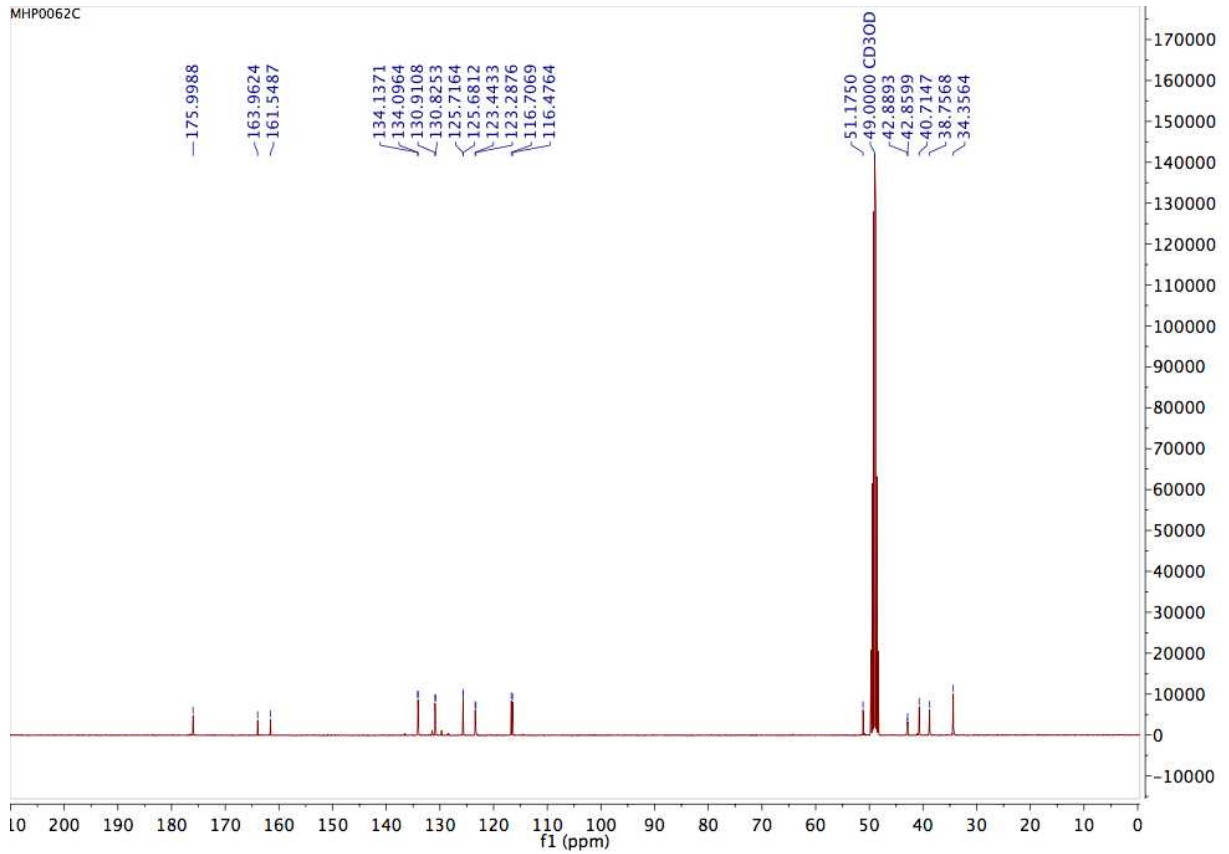



1d

MHP0059

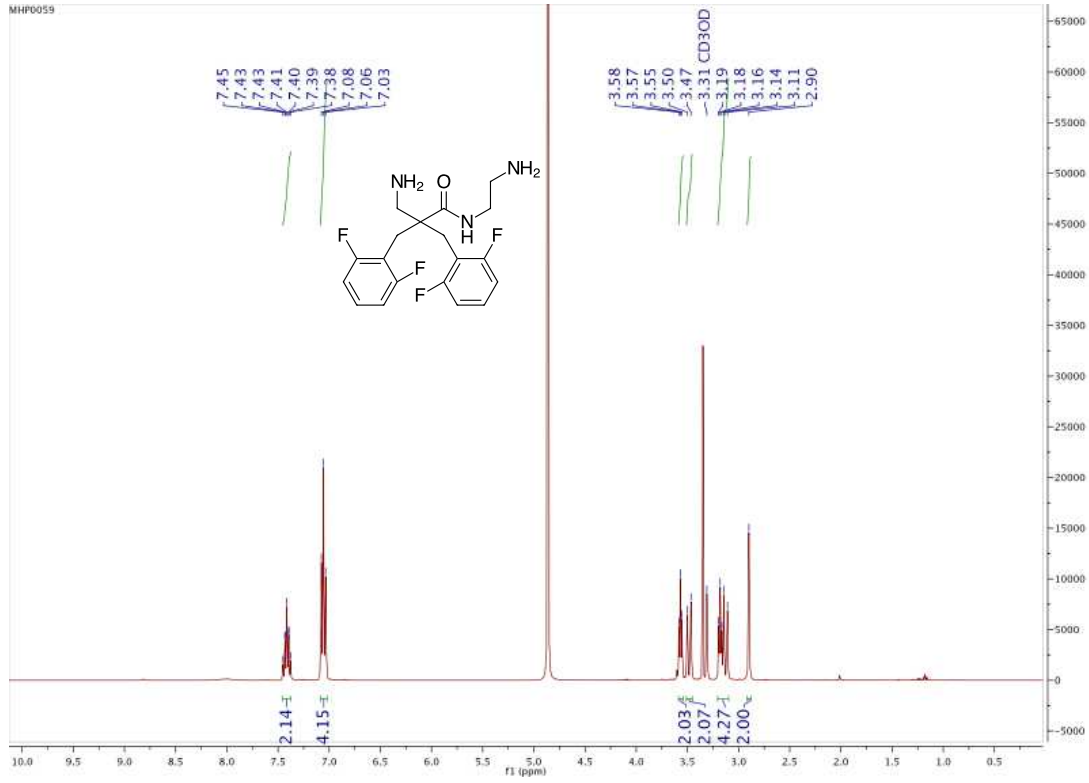

MHP0059

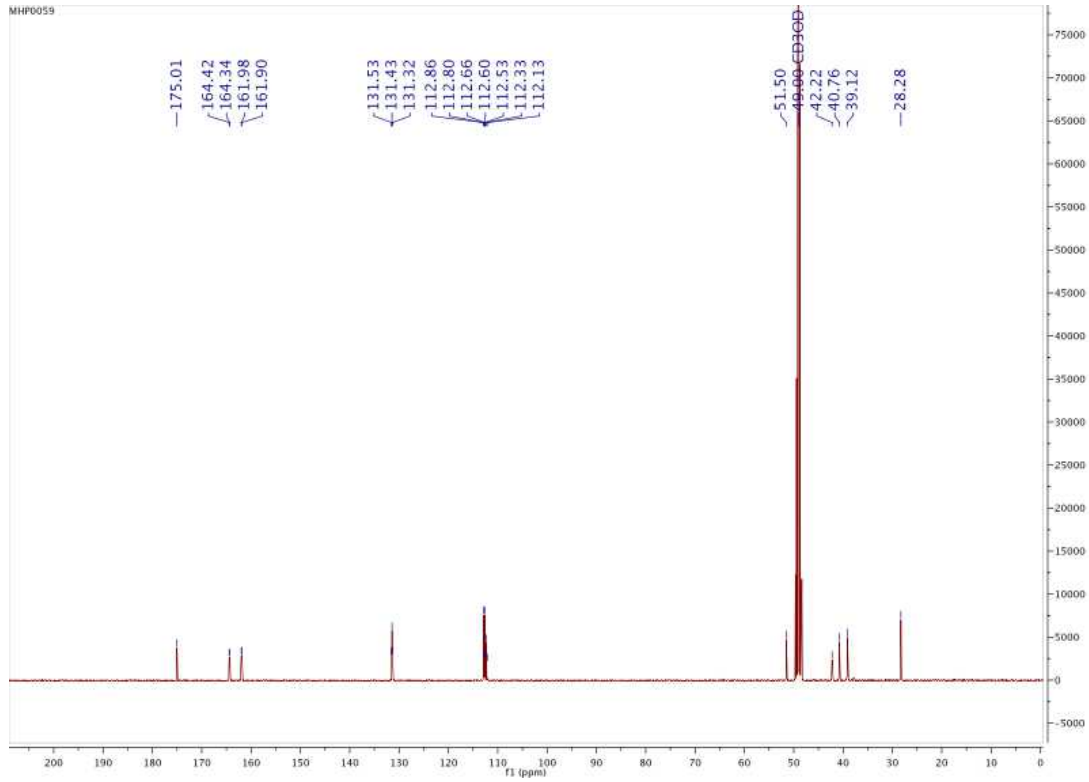

1e

MHP0069

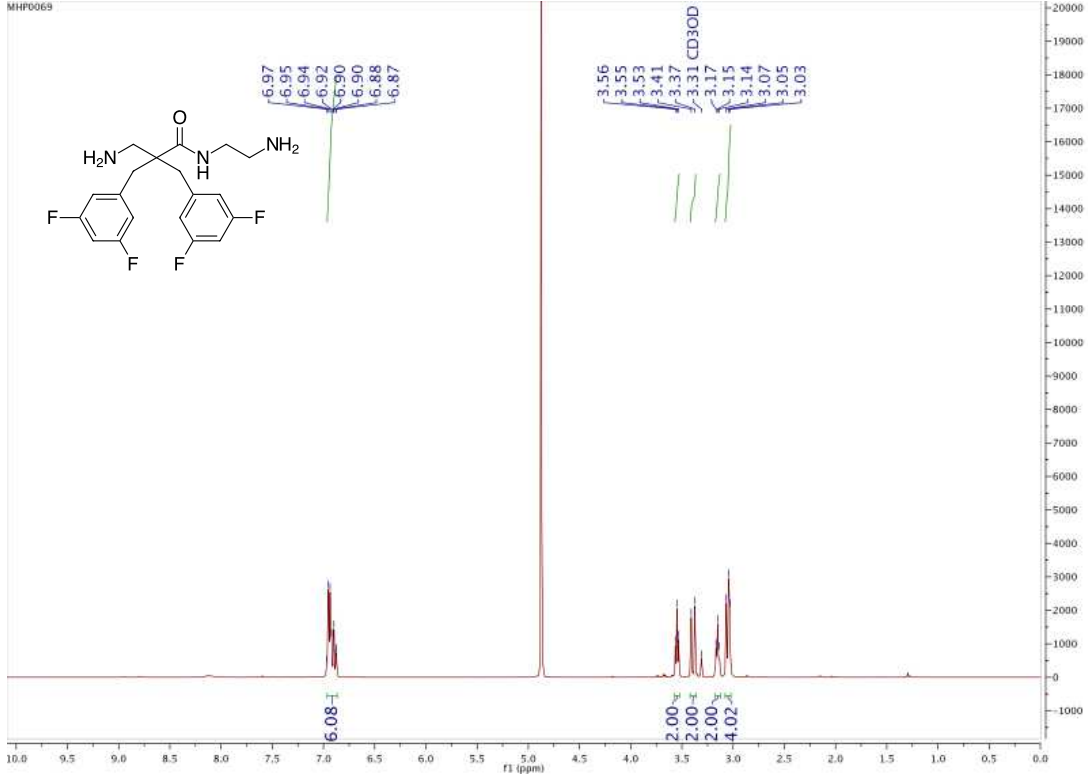

MHP0069C

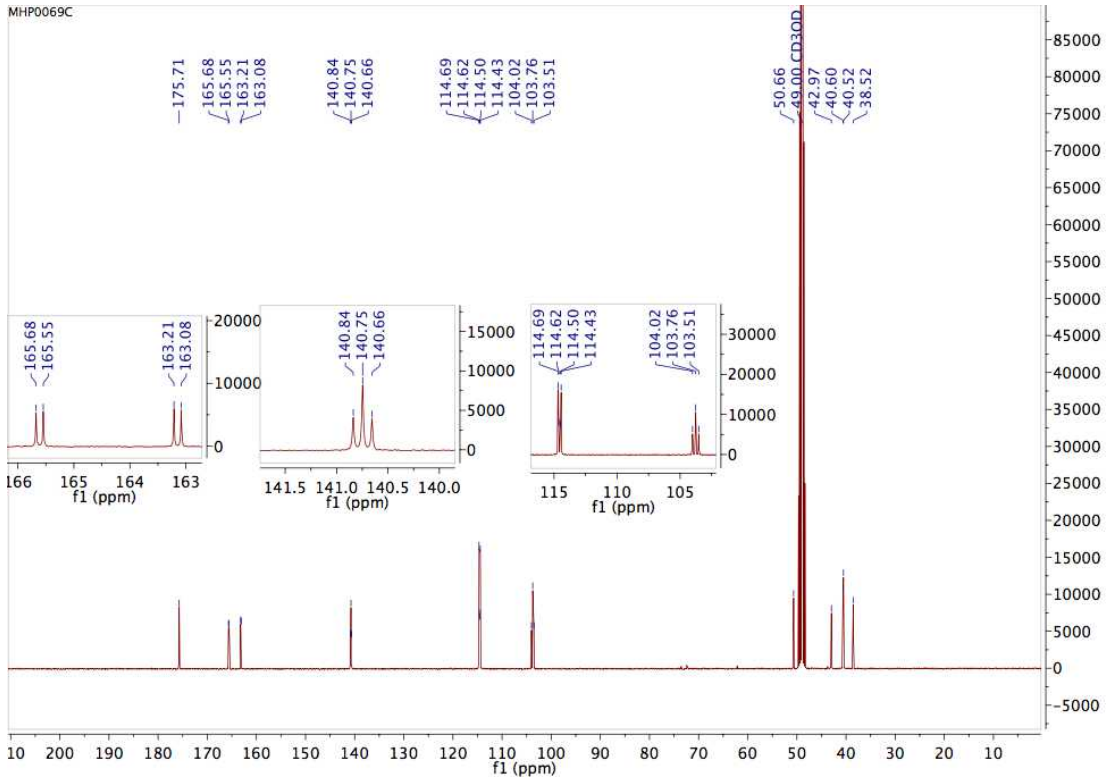

1f

MHP0064

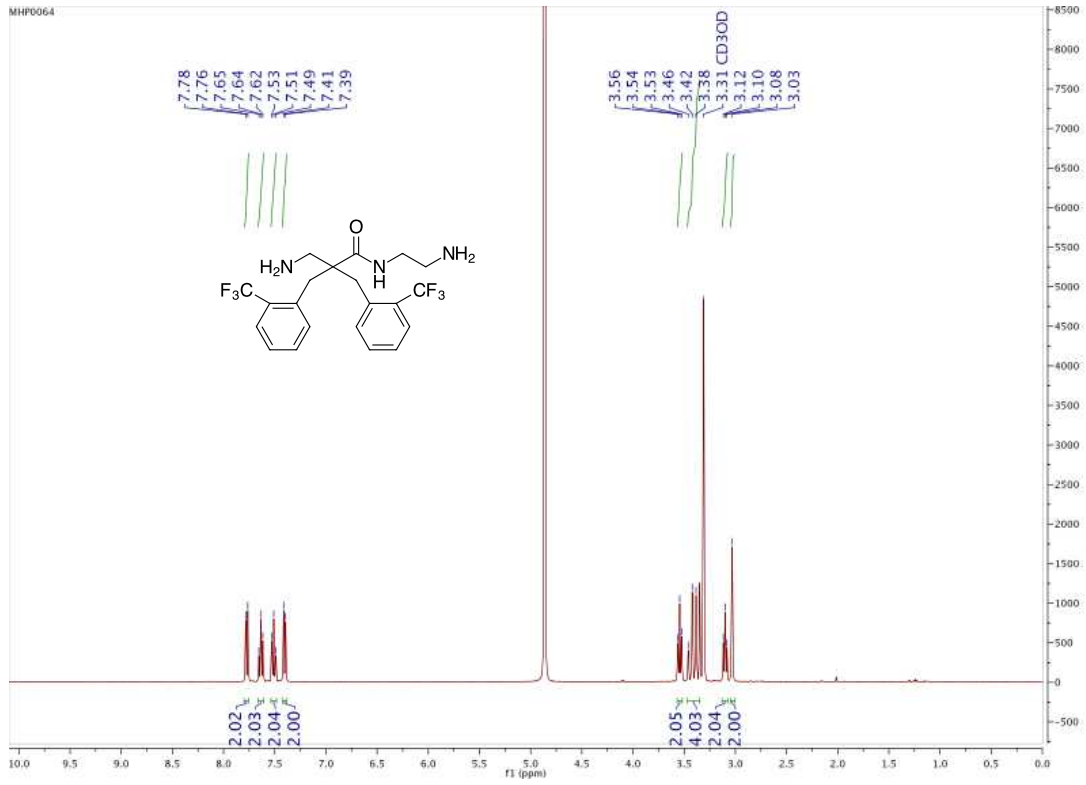

MHP0064

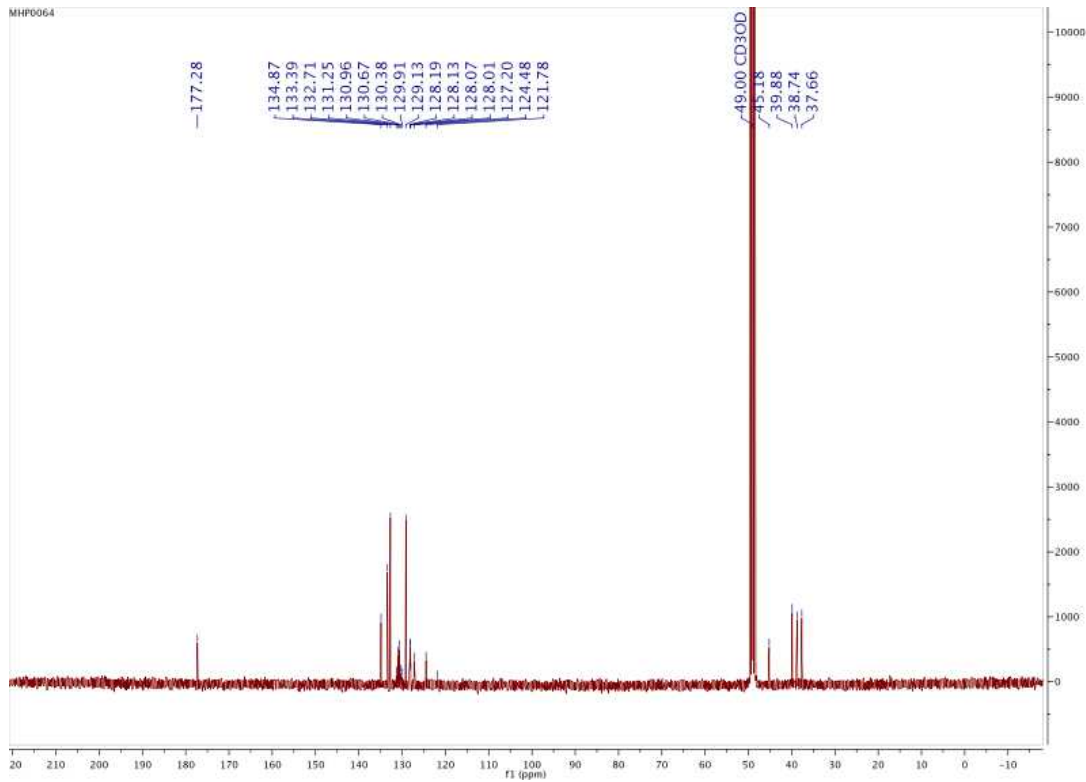

1g

MHP0090-3

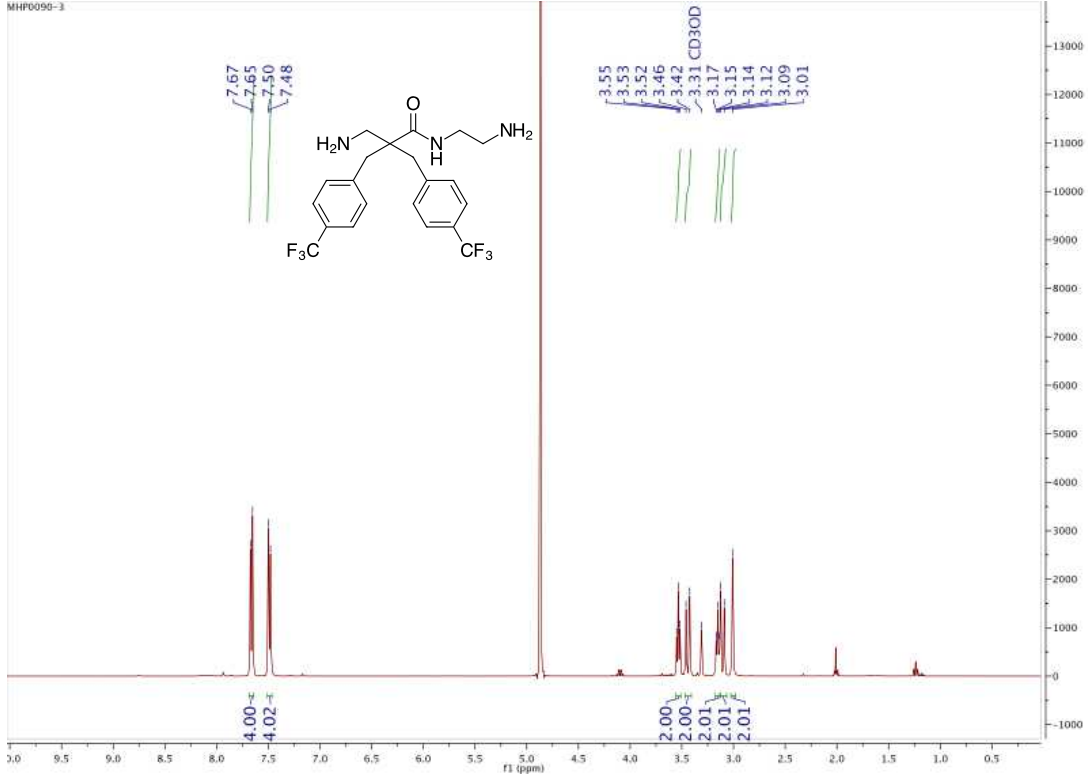

MHP0090-3

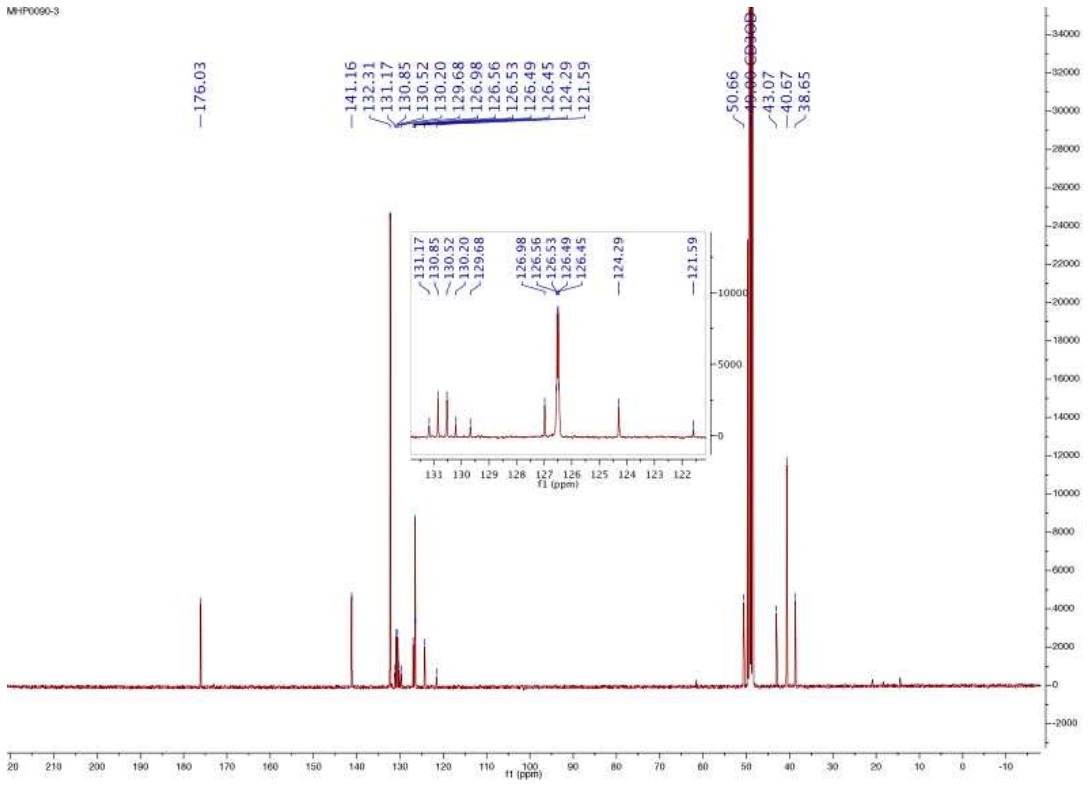

1h

MHP0063

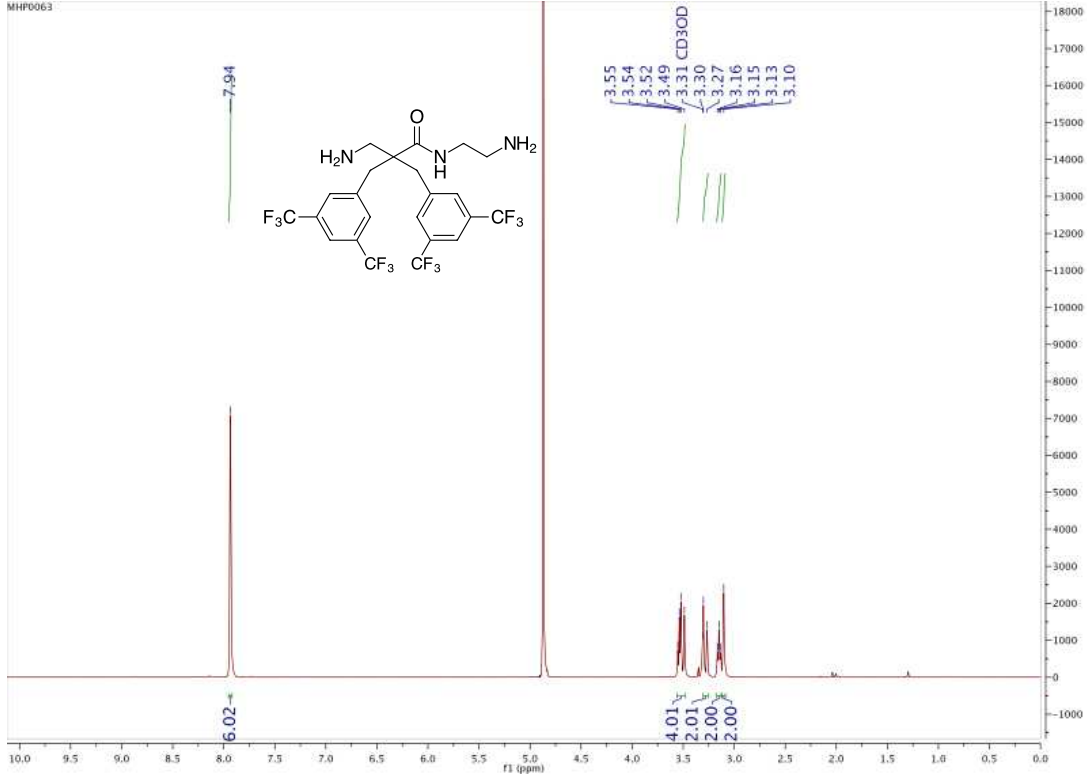

MHP0063

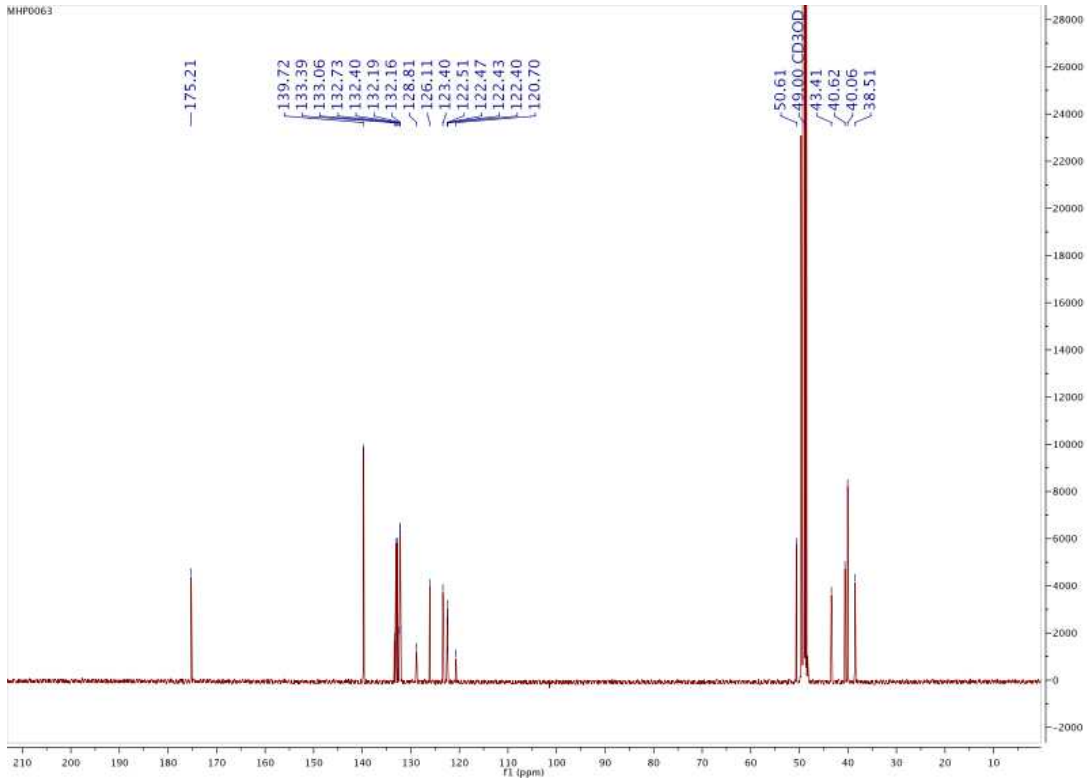

1i

MHP0090-1

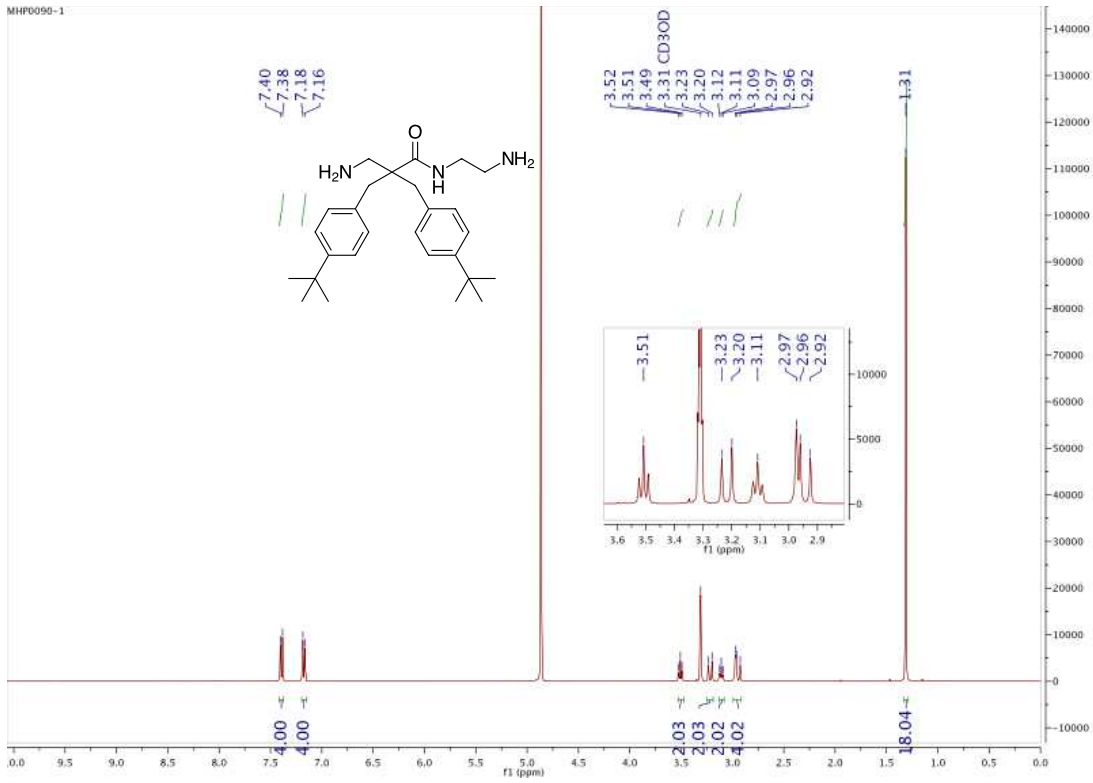

MHP0090-1

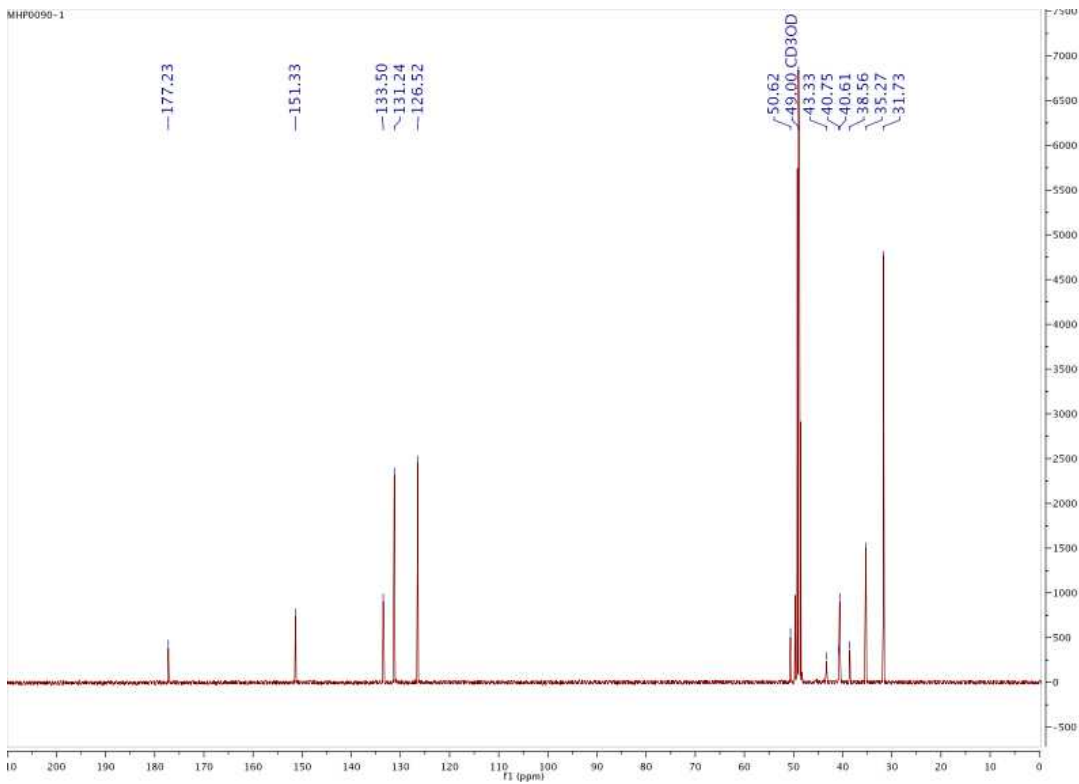

lj

MHP0090-2

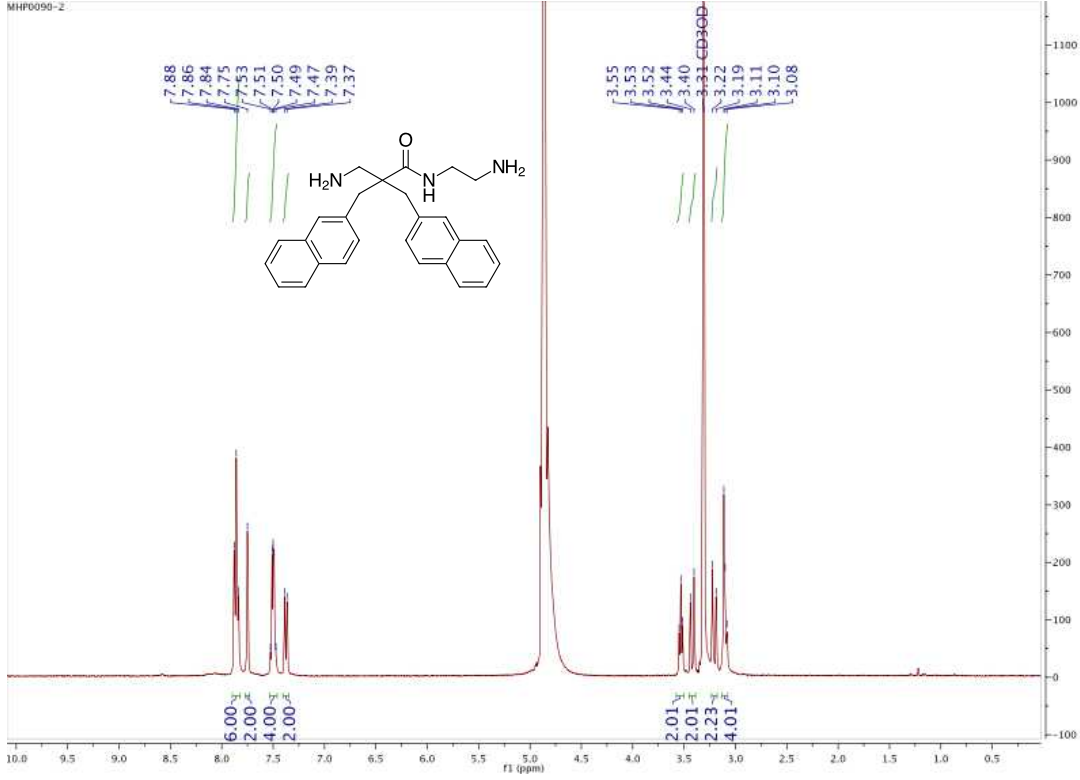

MHP0090-2

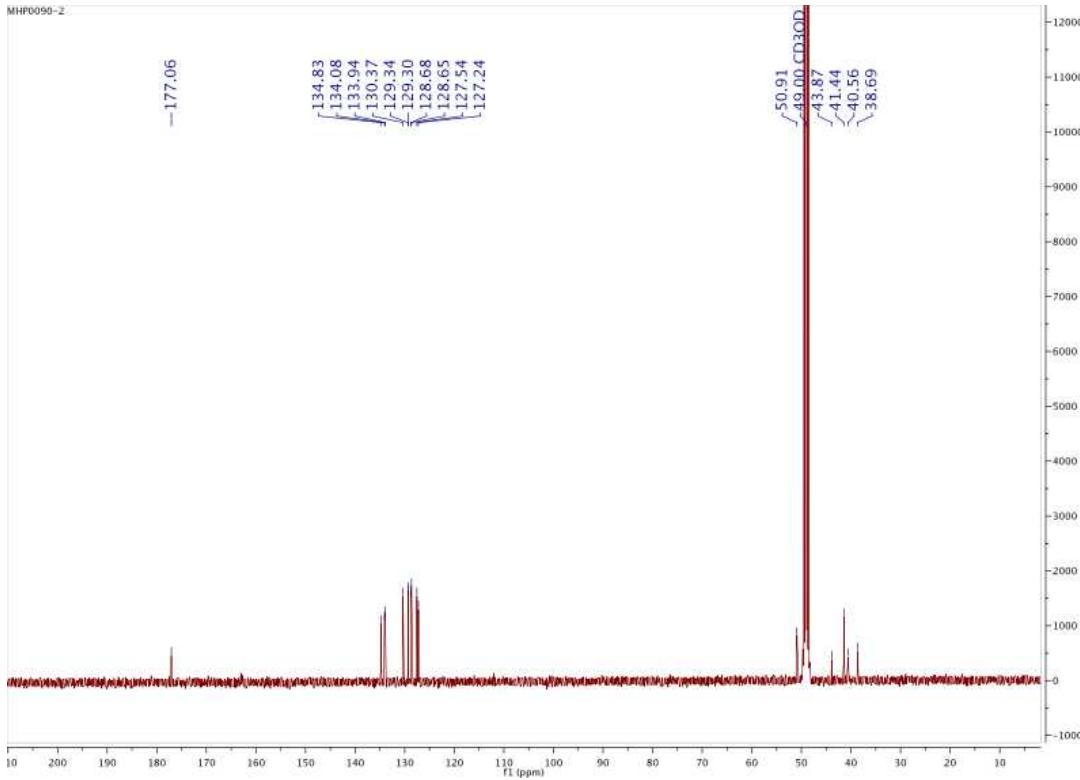

Supplement: c6ob01219a1.pdf [file c6ob01219a1.pdf]
